1 Two new *Rhizobiales* species isolated from root nodules of common sainfoin (*Onobrychis viciifolia*) show  
2 different plant colonization strategies

3

4

5 Samad Ashrafi<sup>1\*¶</sup>, Nemanja Kuzmanović<sup>1,2\*</sup>, Sascha Patz<sup>3\*</sup>, Ulrike Lohwasser<sup>4</sup>, Boyke Bunk<sup>5</sup>, Cathrin  
6 Spröer<sup>5</sup>, Maria Lorenz<sup>6</sup>, Anja Frühling<sup>5</sup>, Meina Neumann-Schaal<sup>5</sup>, Susanne Verburg<sup>5</sup>, Matthias Becker<sup>7‡</sup>,  
7 Torsten Thünen<sup>8‡¶</sup>

8

9

10 \* These authors contributed equally

11 ‡ These authors share last authorship

12

13 ¶ Correspondence:

14 Samad Ashrafi

15 [samad.ashrafi@julius-kuehn.de](mailto:samad.ashrafi@julius-kuehn.de)

16 Torsten Thünen

17 [torsten.thuenen@julius-kuehn.de](mailto:torsten.thuenen@julius-kuehn.de)

18

19 <sup>1</sup> Julius Kühn Institute (JKI) - Federal Research Centre for Cultivated Plants, Institute for Epidemiology  
20 and Pathogen Diagnostics, Braunschweig 38104, Germany

21

22 <sup>2</sup> Julius Kühn Institute (JKI) - Federal Research Centre for Cultivated Plants, Institute for Plant Protection  
23 in Horticulture and Forests, Braunschweig 38104, Germany

24

25 <sup>3</sup> University of Tübingen, Institute for Bioinformatics and Medical Informatics, Algorithms in  
26 Bioinformatics, Sand 14, Tübingen 72076, Germany

27

28 <sup>4</sup> Leibniz Institute of Plant Genetics and Crop Plant Research (IPK) Gatersleben, Genebank Dept., Seeland  
29 06466, Germany

30

31 <sup>5</sup> Leibniz Institute German Collection of Microorganisms and Cell Cultures (DSMZ), Inhoffenstr. 7B, 38124  
32 Braunschweig, Germany

33

34 <sup>6</sup> Technische Universität Braunschweig, Universitätsplatz 2, Braunschweig 38106, Germany

35

36 <sup>7</sup> Julius Kühn Institute (JKI) – Federal Research Centre for Cultivated Plants, Institute for National and  
37 International Plant Health, Messeweg 11-12, Braunschweig 38104, Germany

38

39 <sup>8</sup> Julius Kühn Institute (JKI) – Federal Research Centre for Cultivated Plants, Institute for Crop and Soil  
40 Science, Bundesallee 58, Braunschweig 38116, Germany

41 **Abstract**

42 Root nodules of legume plants are primarily inhabited by rhizobial nitrogen-fixing bacteria. Here we  
43 propose two new *Rhizobiales* species isolated from root nodules of common sainfoin (*Onobrychis*  
44 *viciifolia*), as shown by core-gene phylogeny, overall genome relatedness indices and pan-genome  
45 analysis.

46 *Mesorhizobium onobrychidis* sp. nov., actively induces nodules, and achieves atmospheric nitrogen and  
47 carbon dioxide fixation. This species appears to be depleted in motility genes, and is enriched in genes for  
48 direct effects on plant growth performance. Its genome reveals functional and plant growth-promoting  
49 signatures like a large unique chromosomal genomic island with high density of symbiotic genetic traits.  
50 *Onobrychidicola muellerharveyae* gen. nov. sp. nov., is described as type species of the new genus  
51 *Onobrychidicola* in *Rhizobiaceae*. This species comprises unique genetic features and plant growth-  
52 promoting traits (PGPTs), which strongly indicate its function in biotic stress reduction and motility. We  
53 applied a newly developed bioinformatics approach for *in silico* prediction of PGPTs (PGPT-Pred), which  
54 supports the different lifestyles of the two new species and the plant growth-promoting performance of  
55 *M. onobrychidis* in the greenhouse trial.

56

57 **Introduction**

58 Rhizobia is a common term referring to a paraphyletic group of bacteria, which are able to induce nodules  
59 on roots of legumes and to fix atmospheric nitrogen (N<sub>2</sub>). They have been investigated since the  
60 identification of their roles in nitrogen acquisition for legume plants [1, 2]. Rhizobia show variability in  
61 their nodulation strategies. Some of them are host-specific, while others can nodulate various plant  
62 species, even members of non-legume plants [3]. Rhizobia comprise genetically diverse group of bacteria.  
63 They share a symbiotic nitrogen fixation function that is encoded on symbiotic plasmids or symbiosis  
64 islands within the genome [4, 5], jointly termed as symbiotic genome compartments (SGCs) [6]. Legume

65 root nodules are principally inhabited by nitrogen-fixing bacteria. However, this ecological niche contains  
66 many other non-rhizobial bacterial species, collectively called nodule-associated bacteria [7, 8]. They are  
67 involved in different biological activities e.g. plant growth-promotion and biocontrol [9]. Nevertheless,  
68 our knowledge about the entire biological functions of nodule-associated bacteria is elusive.

69 Based on the current taxonomical information, rhizobia are classified within a number of families of the  
70 alphaproteobacterial order *Rhizobiales*. Non-nitrogen-fixing *Rhizobiaceae* members were also recovered  
71 from legume root nodules [10–13]. Members of well-known rhizobial genera *Bradyrhizobium* [14] and  
72 *Mesorhizobium* [15] were initially classified into the genus *Rhizobium*, but were later reclassified to  
73 separate genera and subsequently placed into new families *Bradyrhizobiaceae* [16] and  
74 *Phyllobacteriaceae* [17].

75 *Onobrychis viciifolia* Scop. (Fabaceae), commonly referred to as common sainfoin, is an autochthonous  
76 leguminous plant with the putative origin in Central Asia. It was introduced to Europe in 14<sup>th</sup> century and  
77 was intensively cultivated until the “green revolution”, during which it was replaced by higher-yielding  
78 legumes such as alfalfa (*Medicago sativa*). *Onobrychis viciifolia* is known as ‘healthy hay’ (from its old  
79 French name “Sain foin”) due to its positive effects on animal health and animal feeding [18–21]. Despite  
80 these positive traits, sainfoin is lacking a widespread application in agriculture in northern Europe. One  
81 reason may be the reports of inadequate levels of nitrogen fixation, resulting in nitrogen deficiency  
82 symptoms, despite the use of bacterial inocula [22–24]. Although sainfoin has been shown to reach similar  
83 rates of nitrogen fixation (130-160 kg/ha) as alfalfa (140-160 kg/ha) [25], the rate is highly dependent on  
84 the efficiency of the associated rhizobial symbiont [26]. Several rhizobia isolated from other legumes  
85 including *Coronilla* spp., *Hedysarum* spp., *Petalostemon* spp., *Oxytropis* spp., and *Astragalus alpinus* can  
86 also nodulate *O. viciifolia* [26, 27]. However, not many studies reported rhizobial strains nodulating  
87 sainfoin [28].

88 In rhizobia, nitrogenase genes are part of SGCs. Such large DNA fragments can be shared among bacteria  
89 by horizontal gene transfer via plasmids, integrative conjugative elements (ICEs) and/or genomic islands  
90 (GEIs) located on chromosomes. Andrews et al. [29] showed that symbiosis genes have been horizontally  
91 transferred within and between rhizobial genera. According to their gene content, GEIs and ICEs can be  
92 described as pathogenicity, symbiosis, metabolic, fitness or resistance islands [6, 30–32]. Both, pathogenic  
93 genome compartments (pathogenicity islands/virulence plasmids) and symbiotic genome compartments  
94 (symbiosis islands/symbiotic plasmids), convert environmental strains to strains that are able to form  
95 close pathogenic or symbiotic associations with eukaryotic hosts [33]. The community of rhizobial and  
96 nodule-associated bacteria is assumed to exchange plant-beneficial traits by transferring SGCs. As an  
97 example, Sullivan and co-workers found that the transfer of the symbiosis island of *Mesorhizobium loti*  
98 strain ICMP3153 (derivative R7A) converted non-symbiotic *Mesorhizobia* to plant symbionts [34].

99 In an attempt to identify rhizobial strains associated with sainfoin, different sainfoin varieties planted in  
100 an experimental field in the Leibniz Institute of Plant Genetics and Crop Plant Research (IPK), Germany  
101 were screened. In this context, two new strains were isolated from root nodules of sainfoin plants. We  
102 investigated these strains: *i*) to characterize them using *in silico* and *in vivo* studies, *ii*) to elucidate their  
103 taxonomic affiliation, plant growth-promoting traits repertoire, and *iii*) to evaluate their plant beneficial  
104 potential using greenhouse experiments.

105

## 106 **Material and Methods**

107

### 108 **Plant material sample collection**

109 One accession (ONO 20) and one cultivar (Taja) were selected for the present study. These plants were  
110 selected because of favourable characters like high tannin content and high biomass, respectively. ONO  
111 20 is an old East German cultivar named *Bendelebener D 4* [35], which was included into the Genebank in

112 1958. Taja is a registered cultivar from the Polish breeder Malopolska Hodowla Roslin Spolka z.o.o in  
113 Krakow. The plants were cultivated on experimental fields of the Leibniz Institute of Plant Genetics and  
114 Crop Plant Research (IPK) in Gatersleben, Germany, during 2017-2019. The fields contain loamy soil, are  
115 very fertile and have high ground points (85-95).

116

#### 117 **Isolation of bacteria from root nodules**

118 Plant roots were washed to remove soil debris. Nodules were excised, surface sterilised for 1 min in 70 %  
119 ethanol, rinsed twice with sterile deionised water (SDW), followed by incubation in 1 % sodium  
120 hypochlorite (NaOCl) for 10 min and six rinses with SDW [36]. Surface sterilised nodules from each root  
121 sample were separately transferred to 2 ml microtubes and crushed with sterile pestles. Tubes were filled  
122 up with 1 ml of SDW or sterile 10 mM MgCl<sub>2</sub> and vortexed for 1 min. An eight-fold serial dilution was made  
123 from 1 ml subsample of the homogenised suspension. A 100 µl subsample of each dilution was plated  
124 onto yeast mannitol agar (YMA; Sigma Aldrich, Merck KGaA, Darmstadt, Germany) supplemented with  
125 Congo red. Plates were incubated at 28°C and monitored daily for 8 days. The bacterial strains, including  
126 isolates studied here (OM4 and TH2) were stored at - 80°C.

127

#### 128 **DNA extraction, sequencing and genome assembly**

129 For details regarding DNA extraction, amplification and sequencing of partial 16S rRNA, *atpD* and *recA*  
130 genes, as well as complete genome sequencing and assembly, see Text S1.

131

#### 132 **Phylogenetic analysis**

133 Phylogenetic analysis was performed based on partial sequences of 16S rRNA gene and housekeeping  
134 genes *recA* and *atpD* and also a large number of conserved core genes. For more details, see Text S2.

135

### 136 **Overall genome relatedness indices**

137 For genus and species delimitation, we calculated various overall genome relatedness indices (OGRIs),  
138 including whole-proteome average amino acid identity (wpAAI) [37–39] , core-proteome average amino-  
139 acid identity (cpAAI), average nucleotide identity (ANI) [37, 40] and digital DNA-DNA hybridization (dDDH)  
140 [41]. To further determine the taxonomic position of the isolates studied here (TH2 and OM4), their  
141 genome sequences were subjected to the Type (Strain) Genome Server (TYGS) pipeline for a whole  
142 genome-based taxonomic analysis [42]. For more details, see Text S3.

143

### 144 **Plasmid similarity estimation**

145 Plasmid similarity to known plasmid sequences was calculated via mash v.2.3 [43] in default dist mode.  
146 Respective reference plasmid sequences were received from the Plasmid database PLSDB version  
147 2020\_06\_29 [44] and the Refseq plasmid collection stored on  
148 <ftp://ftp.ncbi.nlm.nih.gov/refseq/release/plasmid/>. For all plasmid reference hit sequences that showed  
149 at least one overlapping k-mer hash (Table S1) the pairwise mash distances were recalculated (sketch size  
150 10 000; k-mer size 15) and visualized as neighbor network (NNet2004) by the outline algorithm with  
151 Splitstree 5 v.5.2.4 [45, 46].

152

### 153 **Comparative genomics and whole genome alignment**

154 A pan-genome analysis was performed for both isolates, TH2 and OM4, separately, due to the different  
155 phylogenetic relationship, which was obtained by core-genome phylogenomic analysis. Computation of a  
156 common pan-genome of both isolates failed due to high evolutionary distance between both, which led to  
157 a significantly decreasing number of core genes. For best comparability during downstream analysis, all  
158 genomes were annotated with Prokka v.1.14.6 [47]. Roary [48] v.3.13.0 [48] was applied to the annotated  
159 genomes of both isolates, using default parameters. The identity threshold (-i) was set differently

160 according to the respective wpAAI values (Table S2) obtained for isolate TH2 (60 %) and isolate OM4  
161 (80 %), considering the respective group gene/protein similarity. The single nucleotide polymorphism  
162 (SNP) tree of core genes was generated with FastTree v.2.1 [49] based on the maximum likelihood method  
163 and the generalized time reversible (GTR) model of evolution (parameters: -nt -gtr).

164 The genomes of isolate OM4 and its close relatives *M. delmotii* STM4623<sup>T</sup> and *M. temperatum* SDW018<sup>T</sup>  
165 were aligned using MAUVE (snapshot\_2015\_02\_25, default parameters) [50] to find OM4-specific  
166 genomic features. Isolate OM4 specific unaligned regions that did not belong to any locally collinear block  
167 (LCB weight of 52) were extracted from the alignment file to analyse their functional characteristics and  
168 unique gene content.

169

#### 170 **Genomic Functional annotation and visualization**

171 Functional KEGG annotations were achieved for all isolates with the KOfamKOALA command line tool  
172 (<https://www.genome.jp/tools/kofamkoala/>) that applies HMM searches. KEGG comparisons between  
173 genomes were calculated and visualized with MEGAN6 [51] and custom python scripts.

174 Genomic islands of the isolates TH2 and OM4 were detected online by IslandViewer 4 [52] using default  
175 parameters. Genomic prophage and phage-like regions were determined by the webtool PHASTER [53,  
176 54]. AntiSMASH v. 6.0.1 [55] analysis allowed annotation of secondary metabolite biosynthesis gene  
177 clusters (BGCs). Selected annotation features were displayed as circular genome plots with BRIG [56].

178 Unique genes of isolate OM4 were analysed in more detail regarding their functional annotation and  
179 genomic position and affiliation to BGCs.

180

#### 181 **Genes associated with plant-bacteria symbiosis and plant growth-promotion (PGP)**

182 The KEGG annotations of the proteins of all strains were parsed into an IMG-like KEGG annotation file  
183 format via an in-house script and mapped against the plant growth-promotion traits ontology with the



184 PGPT-Pred tool, available on the web platform for plant-associated bacteria PLABase  
185 (<http://plabase.informatik.uni-tuebingen.de/pb/plabase.php> [57]). The PGPT annotations of all strains  
186 were then merged for comparison. The PGPT density was calculated by division of the PGPT count by the  
187 total coding sequence count (CDS) of the respective genomic element (chromosome, plasmid or genomic  
188 region). The PGPT count comparison was plotted as z-scaled heatmap with iTol [58].

189

### 190 **Phenotypic characterization and fatty acid analysis**

191 For details regarding phenotypic characterization and fatty acid analysis, see Text S4 and S5.

192

### 193 **Plant-growth promotion assays**

194 Re-inoculation and nodulation tests were conducted as described in detail in Text S6.

195

## 196 **Results**

197

### 198 **Phylogenetic inferences**

199 A phylogenetic analysis based on partial sequence of the 16S rRNA gene showed that the isolate OM4  
200 formed a highly supported monophyletic group with strains *Mesorhizobium delmotii* STM4623<sup>T</sup>, *M.*  
201 *prunaredense* STM4891<sup>T</sup>, *M. wenxiniae* WYCCWR 10195<sup>T</sup>, *M. muleiense* CCBAU 83963<sup>T</sup>, *M. robiniae*  
202 CCNWYC115<sup>T</sup>, *M. temperatum* SDW018<sup>T</sup> and *M. mediterraneum* NBRC 102497<sup>T</sup> (Fig. S1). Analyses of the  
203 housekeeping genes *recA* and *atpD* revealed a close relationship of OM4 and *M. prunaredense* STM4891<sup>T</sup>  
204 with a high branch support (Figs. S2A and S2B). In addition, whole-genome sequence analysis  
205 demonstrated a distant relationship of these strains (see below).

206 The 16S rRNA gene sequence comparison of isolate TH2 with related *Rhizobiaceae* members suggested a  
207 close relationship with *Rhizobium alvei* strain TNR-22<sup>T</sup> (Acc. No. HE649224.1), sharing 98.08 % nucleotide

208 identity for an alignment length of 1 405 bp. This was below the stringent cutoff of 98.7 % 16S rRNA  
209 sequence identity, and proposed to delineate new species [59]. These two strains shared only 86.14 %  
210 and 87.65 % nucleotide identity for their partial *atpD* and *recA* gene sequences, respectively, suggesting  
211 their distinctiveness. The latter comparison was limited to 496 and 567 bp sequence lengths, because only  
212 partial *atpD* (Acc. No. KX938336) and *recA* (Acc. No. KX938338) sequences for *R. alvei* TNR-22<sup>T</sup> were  
213 available. The 16S rRNA and *recA*-based phylogenetic analyses demonstrated that the isolate TH2 and *R.*  
214 *alvei* formed a monophyletic group with high support values (Figs. S3, S4A). The *atpD*-based analysis  
215 resulted in a tree with different topology, where TH2 did not cluster with *R. alvei*, but with other  
216 representatives of *Rhizobium*, *Agrobacterium* and *Ciceribacter* (Fig. S4B). Whole-genome analysis  
217 however, showed a distant relationship between these strains (see below).

218

#### 219 **Core-genome phylogeny, overall genome relatedness indices, and plasmid comparison**

220 Core-genome phylogeny was determined for isolate OM4 and TH2, and 99 additional *Rhizobiales* strains,  
221 including representatives of *Rhizobiaceae* and *Phyllobacteriaceae*. The core-genome of strains included in  
222 this analysis contained 180 homologous gene clusters. A phylogenomic tree was inferred from 118 top  
223 markers that were selected using GET\_PHYLOMARKERS software.

224 The ML core-genome phylogeny indicated that the isolate OM4 grouped within the genus *Mesorhizobium*  
225 (Fig. 1). It clustered with strains *M. delmotii* STM4623<sup>T</sup> and *M. temperatum* SDW018<sup>T</sup> as its closest  
226 relatives. Isolate OM4 exhibited the highest genomic relatedness to these two strains, as they shared  
227 ~94.8 % ANI (ANIb; Table S3). This was below the proposed threshold for species delineation, which ranges  
228 between 95-96 % for ANI [40]. To clarify taxonomic assignment of the isolate OM4, we calculated  
229 additional OGRIs, in particular orthoANIu and dDDH. Obtained values were also below the thresholds for  
230 species definition (Table S3). This suggests that isolate OM4 represents a novel *Mesorhizobium* species,  
231 for which we proposed the name *Mesorhizobium onobrychidis* sp. nov. (see Appendix). The novelty of *M.*

232 *onobrychidis* strain OM4<sup>T</sup> was also confirmed by TYGS analysis, suggesting that this strain does not belong  
233 to any species found on TYGS database (data not shown).

234 Phylogenetic analysis assigned isolate TH2 to *Rhizobiaceae* (Fig. 1). It clustered independently and was  
235 distantly related to other *Rhizobiaceae* genera described so far. Different OGRIs were computed to further  
236 assess the relationship of isolate TH2 to representatives of *Rhizobiaceae*. Because of the distinctiveness  
237 of this isolate, the comparisons at the nucleotide level were not satisfactory, and only a limited proportion  
238 of the whole-genome DNA sequence could be used for the calculations. For instance, for ANIb, only ~12-  
239 26 % of the whole-genome sequences were aligned and used for comparisons (data not shown).  
240 Therefore, we performed whole-proteome comparisons (wpAAI) that offer a higher resolution. Isolate  
241 TH2 exhibited wpAAI values ranging 61.5-67.5 % with the representatives of *Rhizobiaceae* included in the  
242 analysis (Table S2). The wpAAI values were notably low and supported the divergence of the isolate TH2,  
243 which was evidenced by the separate clustering of the strain on wpAAI dendrogram (Fig. S5). Isolate TH2  
244 exhibited the highest genomic relatedness to strain *Ensifer meliloti* 1021 (67.5 % wpAAI), although they  
245 were phylogenetically distantly related (Fig. 1, Table S3). This value was lower than wpAAI values  
246 computed between representatives of defined and phylogenetically well-separated genera  
247 *Agrobacterium* and *Rhizobium* that ranged 68.12-70.55 % wpAAI. The cpAAI between the isolate TH2 and  
248 reference *Rhizobiaceae* spp. were <76 % (Table S4), which was below the threshold of ~86 % for  
249 delimitation of *Rhizobiaceae* genera proposed recently [60]. This suggested that isolate TH2 represents a  
250 new genus and species, described here as *Onobrychidicola muellerharveyae* gen. nov. sp. nov. Separate  
251 taxonomic position of strain *O. muellerharveyae* TH2<sup>T</sup> was also confirmed by results of TYGS analysis (data  
252 not shown).

253 Plasmids of *M. onobrychidis* OM4<sup>T</sup> and *O. muellerharveyae* TH2<sup>T</sup> did not show high similarity to known  
254 plasmids based on mash analysis and pan-genome analysis and revealed a high proportion of unique  
255 genes (Fig. 2, Figs. S6 and Text S7).

256

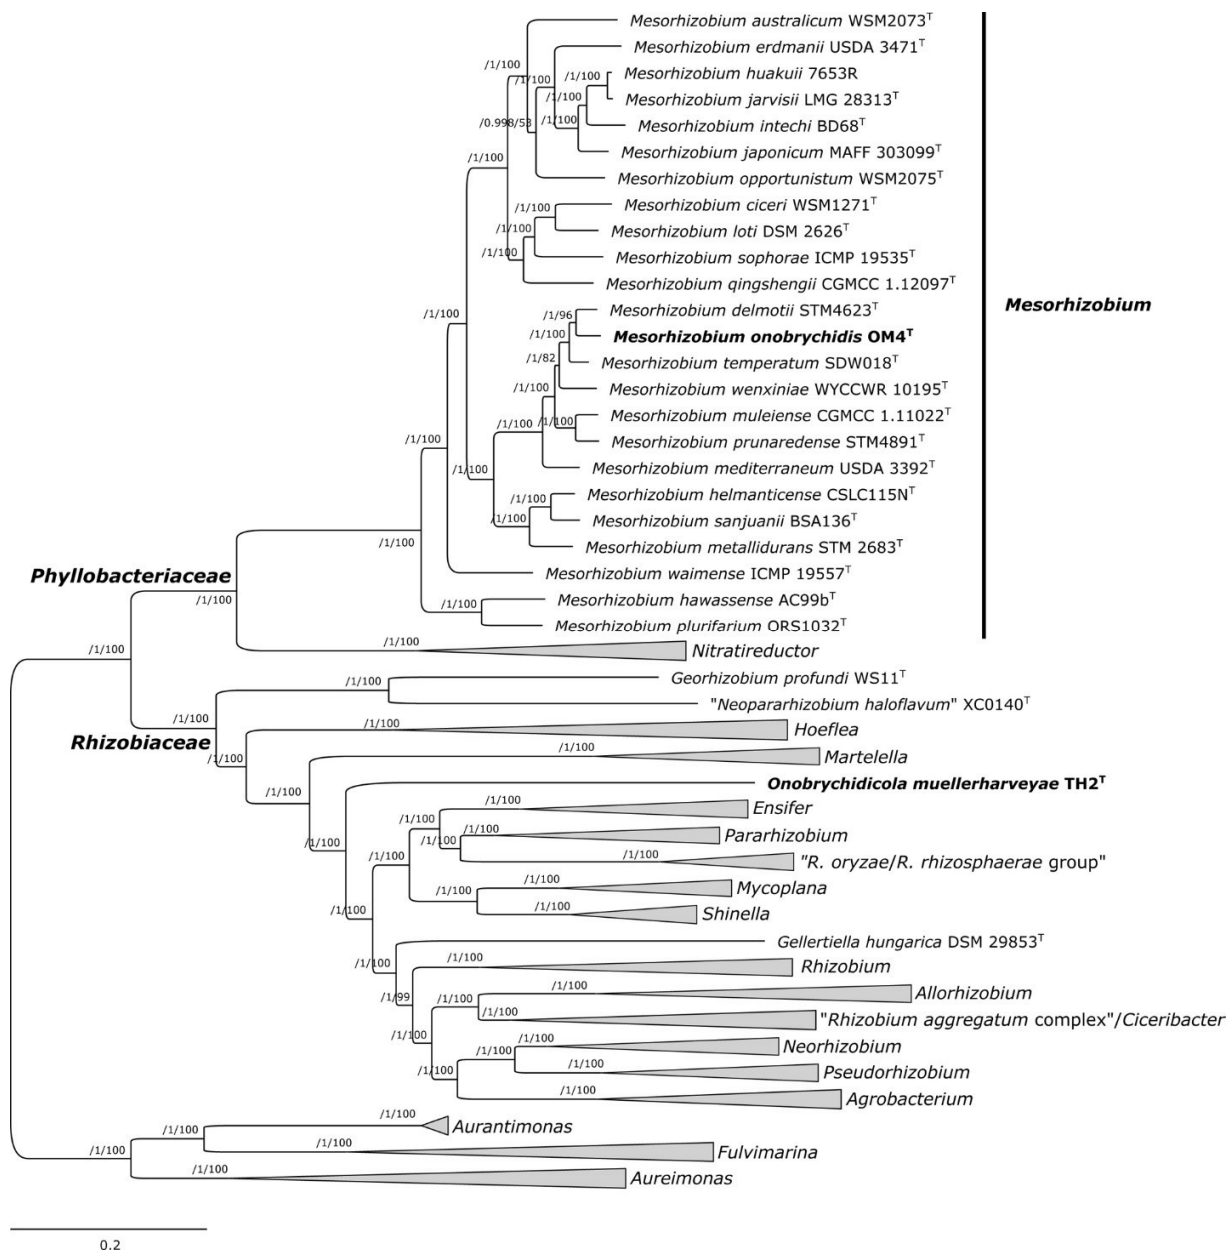

257

258 **Fig.1.** Maximum-likelihood core-genome phylogeny of strains *Onobrychidicola muellerharveyae* TH2<sup>T</sup> and  
 259 *Mesorhizobium onobrychidis* OM4<sup>T</sup>, including representatives of *Rhizobiaceae* and *Phyllobacteriaceae* (genera  
 260 *Mesorhizobium* and *Nitratireductor*). The tree was estimated with IQ-TREE from the concatenated alignment of 118  
 261 top-ranked genes selected using GET\_PHYLOMARKERS software. The numbers on the nodes indicate the  
 262 approximate Bayesian posterior probabilities support values (first value) and ultra-fast bootstrap values (second

263 value), as implemented in IQ-TREE. The tree was rooted using the sequences of representatives of genera  
264 *Aurantimonas*, *Aureimonas* and *Fulvimarina* as outgroup. The scale bar represents the number of expected  
265 substitutions per site under the best-fitting GTR+F+ASC+R8 model. The same tree, but without collapsing clades  
266 (thick gray branches), is presented as Fig. S7.

267

## 268 **Genome sequencing and assembly**

269 Genomes of strains *M. onobrychidis* OM4<sup>T</sup> and *O. muellerharveyae* TH2<sup>T</sup> were sequenced and circularized  
270 employing PacBio and Illumina platforms upon completion. Basic genome assembly statistics of both  
271 strains are summarized in Table 1. The complete genome size of strain *M. onobrychidis* OM4<sup>T</sup> was 7.55  
272 Mb, comprising the circular chromosome of 7.32 Mb and one circular plasmid of 227 kb, stored under the  
273 NCBI GenBank accession numbers: CP062229-CP062230 (Fig. 2). The G+C content of the total genome is  
274 61.9 %. Genome size and G+C content of strain *M. onobrychidis* OM4<sup>T</sup> are similar to other *Mesorhizobium*  
275 spp. (Table S5), for instance to the type strain of this genus, strain *M. loti* DSM 2626<sup>T</sup> (Acc. No.  
276 QGGH01000000).

277 The genome of strain *O. muellerharveyae* TH2<sup>T</sup> composed of the circular chromosome (5.88 Mb) and three  
278 circular plasmids (98 kb, 223 kb and 238 kb), was deposited under the accession numbers CP062231-  
279 CP062234 at NCBI GenBank (Fig. 2). The genome size and G+C content of the total genome were 6.44 Mb  
280 and 60.6 %, respectively, which was similar to other representatives of *Rhizobiaceae* (Table S5).

281 Two chromosomal rRNA (5S, 23S, 16S) operons were identified in both strains OM4<sup>T</sup> and TH2<sup>T</sup>. In *O.*  
282 *muellerharveyae* TH2<sup>T</sup> they were identical, while rRNA operons of strain *M. onobrychidis* OM4<sup>T</sup> differed in  
283 five SNPs located in the intergenic region. For *M. onobrychidis* OM4<sup>T</sup>, two phage-like particles (PLPs) were  
284 identified, while in *O. muellerharveyae* TH2<sup>T</sup> one phage and three PLPs were found (Fig. 2, circle 4).  
285 *Mesorhizobium onobrychidis* OM4<sup>T</sup> harbored 136 transposases and 33 recombinases / invertases *e.g.*,  
286 *xerC* and *xerD*, whereas *O. muellerharveyae* TH2<sup>T</sup> revealed respective counts of 28 and 13 only (Fig 1, circle

287 6). Approximately half of the genes of both genomes were lacking meaningful annotations (hypothetical  
 288 genes) according to homology-based alignment by PROKKA and KofamKOALA hmm searches. According  
 289 to the genomic island prediction tool IslandViewer 4, *M. onobrychidis* OM4<sup>T</sup> -but not *O. muellerharveyae*  
 290 TH2<sup>T</sup>, contains of a very large genomic island on its chromosome harbouring 414 genes (Fig. 2, circle 3;  
 291 Fig. S8A). This is the only larger fragment of the *M. onobrychidis* OM4<sup>T</sup> chromosome with high density of  
 292 unique genes (Table S1). The genomic island on the *M. onobrychidis* OM4<sup>T</sup> chromosome is located next to  
 293 unique genes that are enriched in particular functions such as catalysing DNA exchange. The plant growth-  
 294 promoting trait (PGPT) density of the genomic island is with 75 % considerably higher than the average  
 295 PGPT density of the entire chromosome, which is only 55 % (see also Table 1). Details regarding the  
 296 differences of PGPTs between *M. onobrychidis* OM4<sup>T</sup>, *O. muellerharveyae* TH2<sup>T</sup>, and other closely related  
 297 strains are provided below.

298 **Table 1:** Genome statistics of *Mesorhizobium onobrychidis* OM4<sup>T</sup> and *Onobrychidicola muellerharveyae* TH2<sup>T</sup>

|                                                                 | <i>Mesorhizobium onobrychidis</i> OM4 <sup>T</sup> | <i>Onobrychidicola muellerharveyae</i> TH2 <sup>T</sup>            |
|-----------------------------------------------------------------|----------------------------------------------------|--------------------------------------------------------------------|
| Genome content                                                  | Chromosome (C) and one Plasmid (P1)                | Chromosome (C) and three Plasmids (P1-3)                           |
| Genome size                                                     | Total: 7.55 Mb<br>(C: 7.32 Mb; P1: 227 kb)         | Total: 6.44 Mb<br>(C: 5.88 Mb; P1: 238 kb; P2: 223 kb; P3: 98 kb)  |
| GC content                                                      | C: 61.94 %; P1: 59.8 %                             | C: 60.64 %; P1: 59.75 %; P2: 57.55 %; P3: 56.31 %                  |
| Genes                                                           | 7,415 (7,347 CDS)                                  | 6,373 (6,312 CDS)                                                  |
| Hypothetical genes                                              | 3,779                                              | 3,157                                                              |
| KEGG annotated genes                                            | 3,676                                              | 3,365                                                              |
| Unique genes (PG)*                                              | 1,068                                              | 2,261                                                              |
| Unique hypothetical genes (PG)*                                 | 847                                                | 1,729                                                              |
| rRNA operons (5S, 23S, 16S)                                     | 2                                                  | 2                                                                  |
| tRNAs                                                           | 62                                                 | 53                                                                 |
| Phage, Phage-like particles (PLPs) and transposases             | 2 PLPs; 136 transposases                           | 1 Phage; 3 PLPs; 18 transposases                                   |
| Recombinases/Invertases (e.g. <i>xerC</i> , <i>xerD</i> )       | 27                                                 | 13                                                                 |
| PGPTs (density)                                                 | C: 3 973 (0.5545); P: 65 (0.3591)                  | C: 3 270 (0.57); P1: 110 (0.5263); P2: 227 (0.3910); P3: 50 (0.50) |
| Symbiosis Island (SI) or plasmid (SP) (density) with GC content | SI 1: 421 kb (0.7542); GC: 59.51 %                 |                                                                    |

299 \*PG: pan-genome

*Mesorhizobium onobrychidis* OM4<sup>T</sup>

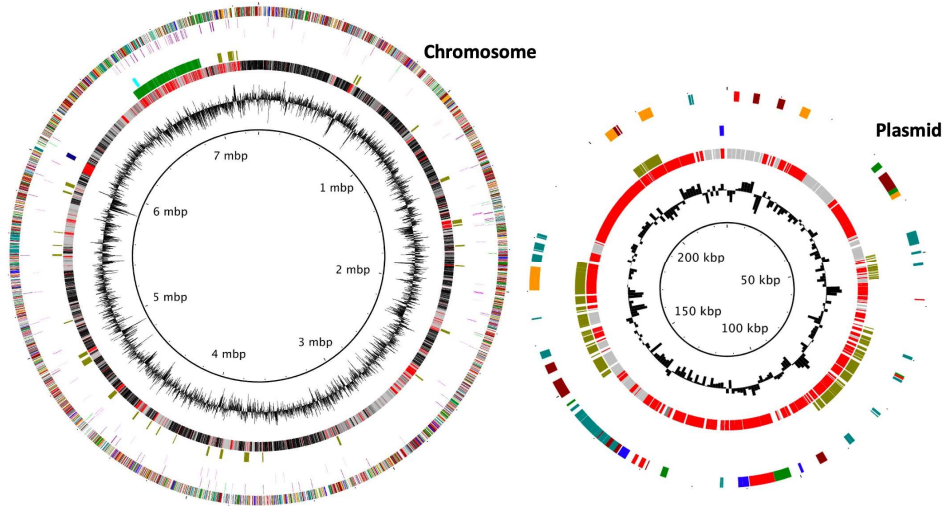

*Onobrychidicola muellerharveyae* TH2<sup>T</sup>

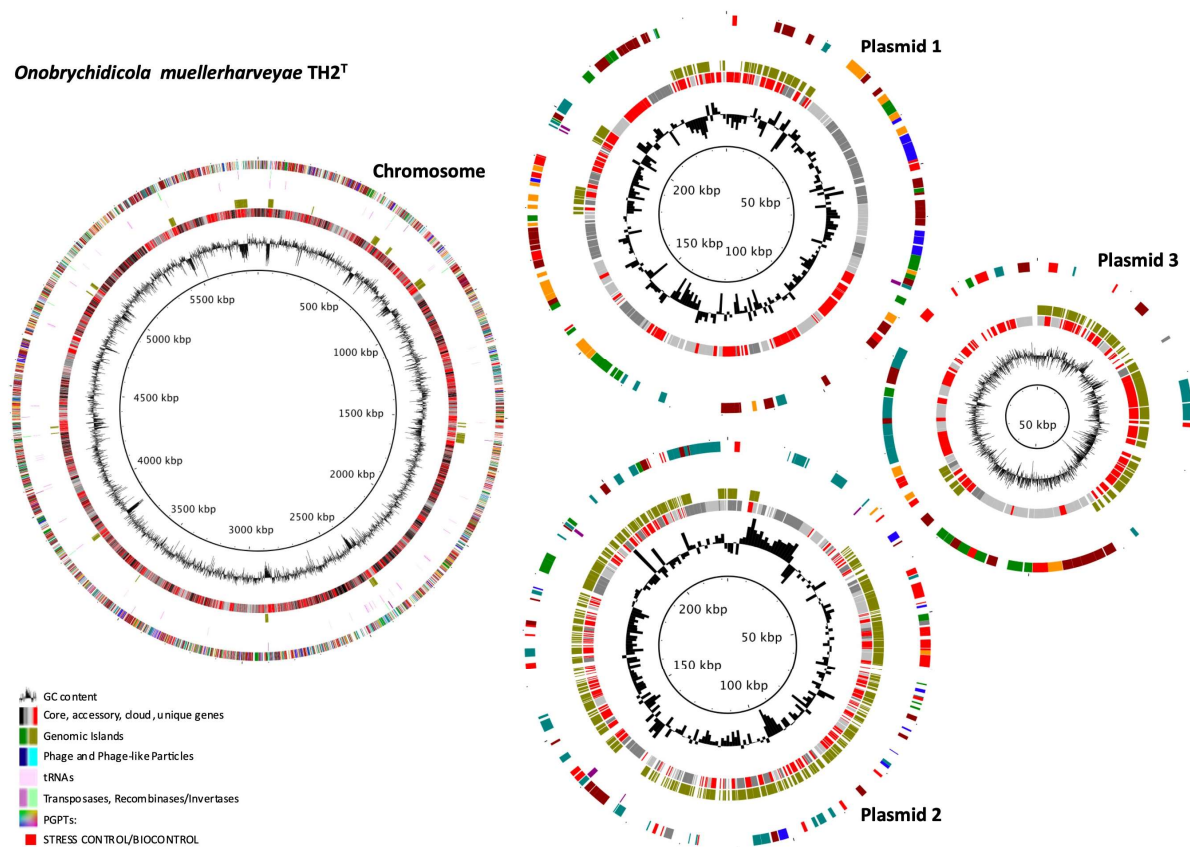

- GC content
- Core, accessory, cloud, unique genes
- Genomic Islands
- Phage and Phage-like Particles
- tRNAs
- Transposases, Recombinases/Invertases
- PGPTs:
  - STRESS CONTROL/BIOCONTROL
  - COLONIZING PLANT SYSTEM
  - BIO-FERTILIZATION
  - PHYTOHORMONE/PLANT SIGNAL PRODUCTION
  - COMPETITIVE EXCLUSION
  - PHYTO-REMEDIATION
  - PLANT IMMUNE RESPONSE STIMULATION
  - PUTATIVE-ENERGY METABOLISM

300

301 **Figure 2:** Genome annotation of *Mesorhizobium onobrychidis* OM4<sup>T</sup> and *Onobrychidicola muellerharveyae* TH2<sup>T</sup>.  
302 Each chromosome and plasmid, respectively, is presented by a circular plot containing seven levels, of which the  
303 innermost circle 1 displays the G+C content of DNA. The circle 2 summarizes the Roary core-genome results with  
304 highlighted core (black), accessory (darkgrey), cloud (lightgrey), and strain-specific (unique) genes (red). Circle 3  
305 presents distribution of genomic island genes predicted by IslandViewer version 4. Among the remaining circles.  
306 Circle 4 demonstrates the genes encoding phages or phage tail-like particles, circle 5 tRNAs and circle 6 transposases  
307 (violet) or recombinases / invertases (turquoise), i.e. enzymes enabling genome reshuffling. The outermost circle 7  
308 presents genes annotated to plant growth-promoting traits (PGPTs) by PGPT-Pred, here subdivided into eight  
309 functional classes on PGPT ontology level 2.

310

### 311 **Comparative genomics and functional annotation**

312 Pan-genome analysis of strains *M. onobrychidis* OM4<sup>T</sup> and *O. muellerharveyae* TH2<sup>T</sup> revealed a large  
313 number of gene clusters, ranging from 36 631 for all *Mesorhizobium* strains to 85 606 for all *Rhizobiaceae*  
314 strains here analysed (Fig. 2, circle 2, Fig. S9 A and B). The strain *M. onobrychidis* OM4<sup>T</sup> revealed 2 683  
315 core, 1 151 accessory, 2 444 cloud and 1 068 unique genes. While 428 unique genes could not be assigned  
316 to any KO number (KEGG annotations), 441 KO numbers were detected for *M. onobrychidis* OM4<sup>T</sup> as  
317 unique genes, with various gene copy number. Functions of unique genes were associated with, among  
318 others, prokaryotic cellular community, signal transduction, carbohydrate and amino acid metabolism,  
319 cofactor and vitamin biosynthesis, energy metabolism, membrane transport and lipid metabolism (Fig.  
320 S10). In contrast, the putative novel genus comprising single strain *O. muellerharveyae* TH2<sup>T</sup>, revealed only  
321 1 107 core genes, while counts of 1 839 for accessory, 1 105 for cloud, and 2 261 for unique genes were  
322 scored. The results did not allow further pan-genomic analysis for *O. muellerharveyae* TH2<sup>T</sup> due to a  
323 distant phylogenetic relation between *O. muellerharveyae* TH2<sup>T</sup> and the strains here analysed.

324 Overall, KEGG functional analysis and respective abundance clustering of all KEGG annotations confirmed  
325 that *M. onobrychidis* OM4<sup>T</sup> contained functional similarities to *M. delmotii* STM4623<sup>T</sup> and *M. temperatum*



326 SDW018<sup>T</sup>. The analysis also supported the novelty of this species when considering only strain-specific  
327 enriched K numbers (Fig. S9 C). Analysing all K numbers for *O. muellerharveyae* TH2<sup>T</sup> resulted in a distinct  
328 clustering, which became more distinct when considering only enriched ones (Fig. S9 D). Both patterns  
329 highly supported its status as a new genus.

330 The KEGG functional annotation for *M. onobrychidis* OM4<sup>T</sup> and *O. muellerharveyae* TH2<sup>T</sup> revealed two  
331 distinct clusters of level 2 and level 3 KEGG functions (Fig. S11, Text S8). *Onobrychidicola muellerharveyae*  
332 TH2<sup>T</sup> showed higher counts for genes related to membrane transport, cell motility, cell growth and death,  
333 antimicrobial drug resistance, signal transduction and replication, repair, transport and catabolism (Fig.  
334 S11 A).

335 The detection of specific secondary metabolite biosynthesis gene clusters (BGCs) further confirmed the  
336 different lifestyles of strains OM4<sup>T</sup> and TH2<sup>T</sup> (Fig. S12, Text S9). The whole genome alignment of  
337 *Mesorhizobium* spp. revealed 85 regions unique to *M. onobrychidis* OM4<sup>T</sup>, harbouring at least five and up  
338 to 77 genes as one of its novel species characteristics (Fig. S13, Table S1, Text S10). Twenty-one regions  
339 could be assigned to seven of the entire 11 BGCs of OM4<sup>T</sup>. Among them, two BGCs matched with the  
340 genomic island, which covers 63 unaligned regions including 364 genes, all assigned as unique genes (Fig.  
341 S14, Table S2, Text 10).

342

### 343 **Functional PGPT annotation**

344 The main genetic features and functional PGPT annotations based on KOfam-KEGG to PGPT mapping of  
345 all 80 strains, are summarised in a heatmap (Fig. 3). Detailed values are given in Table S1. The pattern of  
346 depleted (blue) and enriched (red) traits coincided with the phylogenetic clades – apart from very few  
347 exceptions in clade C. Heatmap fractions belonging to the *Mesorhizobium* clade (clade A), the *Ensifer* clade  
348 (clade D) and the *Rhizobium* clade (clade F) were dominated by PGPT classes of enriched gene counts.

349 Focusing on the *Mesorhizobium* clade, a fraction of depleted traits refers to three subclasses of the PGPT  
350 class “colonization”, namely “chemotaxis” and “flagellar assembly”, important for bacteria to migrate  
351 towards chemical stimuli. In total 4 046 genes of *M. onobrychidis* OM4<sup>T</sup> could be allocated to PGPTs  
352 compared to an average of 3 735 genes among other *Mesorhizobium* strains. A similar PGPT count was  
353 also found for its closest relative *M. delmotii* STM4623<sup>T</sup>. In general, the newly described species *M.*  
354 *onobrychidis* is very similar to the other species of genus *Mesorhizobium*. Among *Mesorhizobium*, *M.*  
355 *onobrychidis* OM4<sup>T</sup> is one of the strains with the highest number of genes in the following PGP level 2  
356 classes: biofertilization, phytohormone, plant signal production, stress resistance, competitive exclusion,  
357 and plant immune response stimulation. PGPT counts of *M. onobrychidis* OM4<sup>T</sup> for the mentioned  
358 phytohormone and plant signals and plant immune system stimulation traits were higher compared to its  
359 two closest relatives *M. delmotii* STM4623<sup>T</sup> and/or *M. temperatum* SDW018<sup>T</sup> (Table S1). In contrast, *M.*  
360 *onobrychidis* strain OM4<sup>T</sup> showed only an average amount of bioremediation genes, distinguishing it  
361 merely from *M. delmotii* STM4623<sup>T</sup> and *M. temperatum* SDW018<sup>T</sup>. *Mesorhizobium onobrychidis* OM4<sup>T</sup>  
362 harbored genes related to fixing carbon dioxide via RUBISCO as another highly plant beneficial feature  
363 (data not shown). It comprised a versatile set of stress resistance and colonization genes, their abundance  
364 mostly coincided with its both closest relatives. Furthermore, it contained the genetic ability for  
365 nodulation, vitamin B3 and pilus-fimbriae biosynthesis, the use of plant-derived metabolites *e.g.* amino  
366 acids, and the degradation of jasmonate/salicylic acid. Traits related to competitive exclusion showed a  
367 higher PGPT count for bacterial fitness compared to all other *Mesorhizobium* strains, especially for  
368 oxidative phosphorylation, resistance against plant antimicrobial compounds hydroxycinnamic acid and  
369 quinolene. The most significant differences between *M. onobrychidis* OM4<sup>T</sup> and other *Mesorhizobium*  
370 strains occurred in the number of transposases and *xerC/xerD* recombinases, which are important PGPTs  
371 related to colonization and competitive exclusion. *Mesorhizobium onobrychidis* OM4<sup>T</sup> has approximately  
372 2.5-times as many genes belonging to these categories as the other *Mesorhizobium* strains on average

373 (transposases 136 compared to 57; recombinases 33 compared to 13). Regarding secretion systems, *M.*  
 374 *onobrychidis* OM4<sup>T</sup> encoded one T6SS, two T3SSs and one T4SS (*trb*) on its chromosome, as well as one  
 375 copy of the *virB*-specific T4SS on its plasmid. The PGPT distribution alternated in shared pattern or highly  
 376 varied between *M. onobrychidis* OM4<sup>T</sup> and its relatives *M. delmotii* STM4623<sup>T</sup> and/or *M. temperatum*  
 377 SDW018<sup>T</sup>.  
 378

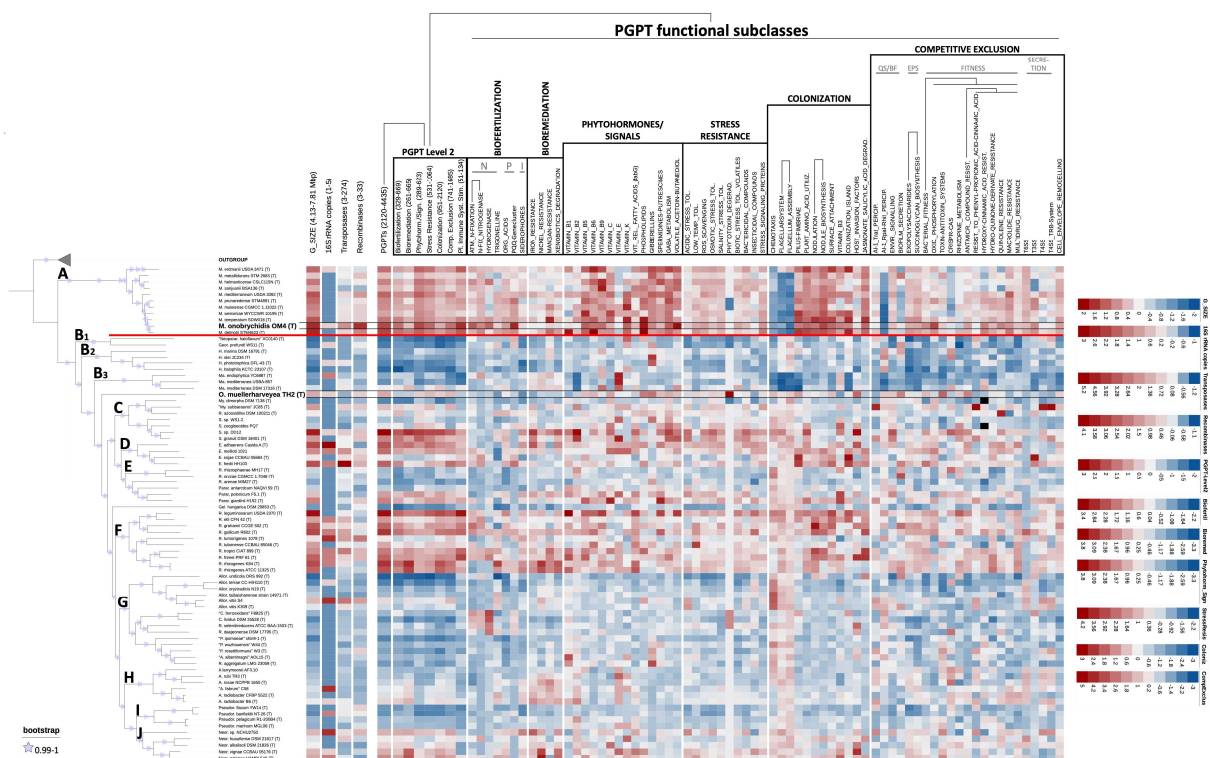

379  
 380 **Fig. 3:** Functional PGPT heatmap based on KEGG annotations highlighting PGPTs abundant differences in functional  
 381 classes and important genetic characteristics of *Mesorhizobium onobrychidis* OM4<sup>T</sup>, *Onobrychidicola*  
 382 *muellerharveyae* TH2<sup>T</sup>, and other *Rhizobiaceae* and *Phyllobacteriaceae*. The reddish colour shows enriched and  
 383 blueish colour depleted gene numbers based on a trait specific z-scale, which is given on the right. The phylogenetic  
 384 tree provided on the left hand side allows better understanding of the PGPT distributions. Respective phylogenetic  
 385 clades are highlighted by capital letters within the tree.  
 386

387 *Onobrychidicola muellerharveyae* TH2<sup>T</sup> strongly differed in its overall PGPT abundancy profile from any  
388 other phylogenomic clades (Fig. 3, B1-3 and C-J). It contained a rather low number of genes for  
389 biofertilization and bioremediation, while the classes phytohormone and plant signaling, stress resistance,  
390 colonization and competitive exclusion were slightly above average. *Onobrychidicola muellerharveyae*  
391 TH2<sup>T</sup> is one of the *Rhizobiaceae* strains with highest phospholipid and gibberellin encoding PGPT count. In  
392 terms of stress resistance, *O. muellerharveyae* TH2<sup>T</sup> exceeds all other strains in the copy number of the  
393 gene for tabtoxin degradation (*ttr*), which is produced by some plant pathogens. While most *Rhizobiaceae*  
394 have one tabtoxin degradation gene (Fig. 3), *O. muellerharveyae* TH2<sup>T</sup> contained four copies of this gene.  
395 In terms of competitive exclusion, *O. muellerharveyae* TH2<sup>T</sup> was superior to all other investigated strains  
396 concerning the enrichment of genes for toxin-antitoxin systems (TASs). This is the case also in biofilm  
397 secretion and resistance to antimicrobial compounds. In terms of (host) colonization, *O. muellerharveyae*  
398 TH2<sup>T</sup> was remarkable in subclasses “host invasion factors” and subclasses that enable target-oriented  
399 movement (“chemotaxis, flagellar system, flagellum assembly”). However, it lacked the nodulation gene  
400 cluster, despite possessing single nodulation-associated genes like *nolA*, and *nodD*. It showed an  
401 exceptional higher gene count for the plant branching inhibition and embryogenesis compounds  
402 spermidine and putrescine that act as plant signals. Regarding secretion systems, *O. muellerharveyae* TH2<sup>T</sup>  
403 only harbored one T4SS (*virB*) on plasmid 2 and one T2SS on plasmid 3.

404

#### 405 **Phenotypic characterization and fatty acid analysis**

406 Phenotypic characteristics of strains *O. muellerharveyae* TH2<sup>T</sup> and *M. onobrychidis* OM4<sup>T</sup> are summarized  
407 in Table S6. Differential characteristics of *O. muellerharveyae* TH2<sup>T</sup> and the type species from the other  
408 genera of family *Rhizobiaceae* are indicated in Table S5. Phenotypic tests performed with API 20NE system  
409 and Biolog GEN III microplates were assessed as unreliable, since negative reaction was observed for  
410 majority of tests (data not shown). This was likely because of the growth conditions that were inadequate

411 for these strains. Therefore, most of the tests included in API 20NE system were repeated as conventional  
412 biochemical assays in test tubes, in order to facilitate the monitoring of bacterial growth and result  
413 assessment. Although more satisfactorily results were obtained in this way, no bacterial growth was  
414 observed for some tests *i.e.* in media containing L-tryptophane as a substrate (indole production test). For  
415 strain *M. onobrychidis* OM4<sup>T</sup>, no bacterial growth was observed in media containing aesculine ferric citrate  
416 (aesculine activity test) and gelatin (aesculin hydrolysis test) as substrates.

417 The results of the fatty acid analysis are summarised in the Table S7. The major fatty acids (>5 %) of *O.*  
418 *muellerharveyae* TH2<sup>T</sup> are C<sub>18:1</sub> w7c, C<sub>19:0</sub> CYCLO w7c, C<sub>16:0</sub> and C<sub>17:0</sub> CYCLO w7c. Generally, as in other  
419 *Rhizobiaceae* members, the dominant fatty acid in *O. muellerharveyae* TH2<sup>T</sup> was C<sub>18:1</sub> w7c, which is in  
420 some strains comprised in Summed feature 8 (C<sub>18:1</sub> w7c/C<sub>18:1</sub> w6c). Unlike other type species from the  
421 other genera of *Rhizobiaceae*, *O. muellerharveyae* TH2<sup>T</sup> contained relatively high (>5 %) amount of C<sub>17:0</sub>  
422 CYCLO w7c. For *M. onobrychidis* OM4<sup>T</sup> the major fatty acids (>5 %) were C<sub>18:1</sub> w7c, C<sub>16:0</sub>, C<sub>19:0</sub> CYCLO w7c,  
423 11 methyl C<sub>18:1</sub> w7c and C<sub>18:0</sub>, similarly as in other *Mesorhizobium* spp. [61].

424

#### 425 **Plant nodulation and growth experiment**

426 Nodulation and plant growth promotion assays confirmed Koch's postulates for strains *M. onobrychidis*  
427 OM4<sup>T</sup> and the control *R. leguminosarum* TS1-3-1. Both strains could be re-isolated from surface sterilized  
428 nodules. Re-isolation of *O. muellerharveyae* TH2<sup>T</sup> failed for both single inoculations and co-inoculation  
429 with *R. leguminosarum* TS1-3-1. Sainfoin inoculated with *M. onobrychidis* OM4<sup>T</sup> showed a statistically  
430 significant gain in aboveground biomass of all three tested sainfoin varieties (Fig. 4). Plants treated with  
431 *O. muellerharveyae* TH2<sup>T</sup> did not exhibit increased biomass.

432

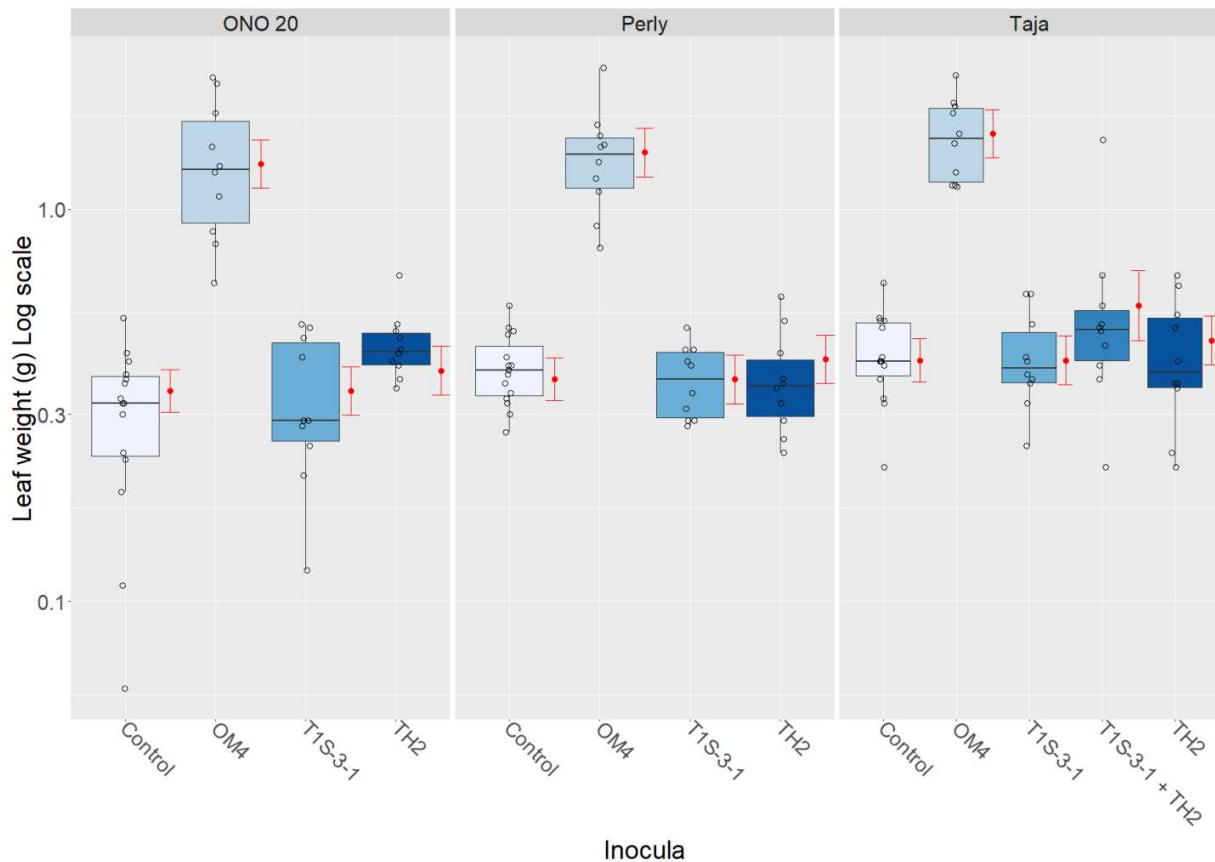

433

434 **Fig. 4:** Plant biomass of nodulation assay using sainfoin accession ONO 20 and varieties Perly and Taja inoculated

435 with *Mesorhizobium onobrychidis* OM4<sup>T</sup> or *Onobrychidicola muellerharveyae* TH2<sup>T</sup>. *Rhizobium leguminosarum* T1S-

436 3-1, known to induce nodulation, was used as a positive control. *Onobrychidicola muellerharveyae* TH2<sup>T</sup> and *R.*

437 *leguminosarum* T1S-3-1 were inoculated together into variety Taja as an attempt to piggyback *O. muellerharveyae*

438 TH2<sup>T</sup> into sainfoin plants. The negative control ("Control") received no inoculation. Red dots and error-bars showing

439 results of GLM statistical analysis.

440

441

442

443

444

445 **Discussion**

446

447 **Bioinoculant potential and host interaction**

448 The functional KEGG analyses revealed two contrasting settings for *M. onobrychidis* OM4<sup>T</sup> and *O.*  
449 *muellerharveyae* TH2<sup>T</sup>, indicating two different lifestyles. Both strains differ in their competitive strategies,  
450 especially for colonizing the plant system. *In silico* analysis of PGPTs highlights the potential of *M.*  
451 *onobrychidis* OM4<sup>T</sup> to improve plant performance via biofertilisation, phytohormone and plant signal  
452 production. Genes for root colonisation and adhesion by nodulation (*nod* gene cluster) and biotin  
453 metabolism were highly enriched in *M. onobrychidis* OM4<sup>T</sup>, whereas *O. muellerharveyae* TH2<sup>T</sup> revealed a  
454 higher count for genes affiliated to motility, chemotaxis, and host invasion.

455 *Onobrychidicola muellerharveyae* TH2<sup>T</sup> possessed all genes to assemble a complete flagellum with three  
456 different copies of the flagellin gene (*fliC*) allowing presumably higher diversity of flagellin epitopes acting  
457 as microbe-associated molecular patterns (MAMPs). Allelic variation of *fliC* is employed by bacteria to  
458 avoid the plant immune response [62]. *Onobrychidicola muellerharveyae* TH2<sup>T</sup> lacked the nodulation gene  
459 cluster but harboured two nodulation-associated genes (*nolA* and *nodD*). Assumed that *O.*  
460 *muellerharveyae* TH2<sup>T</sup> is not capable of inducing nodulation, this strain can be considered only as a nodule-  
461 associated strain. Our greenhouse experiments confirmed the *in silico* analysis.

462 Although it carries a large amount of PGP genes, *O. muellerharveyae* TH2<sup>T</sup> showed no effect on sainfoin  
463 plants in our inoculation experiment under nitrogen-limited conditions. *Onobrychidicola muellerharveyae*  
464 TH2<sup>T</sup> might achieve better potential under biotic stress condition [9], as its highest number of genes were  
465 found in functional classes referring to bacterial fitness/ stress tolerance. In contrast to most other  
466 *Rhizobiaceae*, which have only one copy, *O. muellerharveyae* TH2<sup>T</sup> had four copies of the tabtoxin  
467 degradation gene (*ttr*). Plant pathogens such as *Pseudomonas syringae* produce tabtoxin for chlorosis and  
468 lesion formation [63] and carry a *ttr* gene for self-protection from tabtoxinine-beta-lactam [64]. It can be

469 assumed that the *ttr* gene products of *O. muellerharveyae* TH2<sup>T</sup> diminish the deleterious effect of  
470 phytotoxin-producing bacteria.

471 Among all analysed bacteria, *O. muellerharveyae* TH2<sup>T</sup> contained the highest fraction of genes belonging  
472 to toxin-antitoxin systems (TAS). It is uncertain whether TAS provides any advantage to its host plant,  
473 since plant pathogenic bacteria such as *Xylella fastidiosa* also employ TASs [65]. It has been argued that  
474 TASs do not necessarily provide an advantage to the producing bacterial strain. For example,  
475 chromosomal TASs of *Pseudomonas putida* were reported to be rather selfish than beneficial, and an  
476 indirect positive effect for plants cannot be ruled out [66]. This example on TAS illustrates the need for  
477 further functional studies of particular genes, and shows the difficulty to assign them to a unique purpose.  
478 Further effort is needed to identify plant beneficial traits for robust and reliable prediction of PGPTs.  
479 However, *M. onobrychidis* OM4<sup>T</sup> provides a convincing example that *in silico* analyses can already be used  
480 for identification of bacterial strains exhibiting a beneficial impact on plants. Here we showed that  
481 comparative genomics of PGPTs, based on the novel ontology, is a solid tool that considers widely  
482 acknowledged PGP pathways such as nitrogen and carbon dioxide fixation together as one entity (bio-  
483 fertilization). The use of bioinformatics for determining genomic islands *e.g.* via IslandViewer combined  
484 with PGPT enrichment analyses demands a reclassification of symbiotic island and symbiotic plasmids, as  
485 not all criteria defined by Ling et al. [67] match. The lack of these genes in the genus *Mesorhizobium*  
486 (exception for strain USDA 3471) and in *M. onobrychidis* OM4<sup>T</sup> suggests that most of the *Mesorhizobium*  
487 strains included in our *in silico* analyses are immotile or at least do not move by means of flagella.

488

#### 489 **Genetic features of OM4**

490 *Mesorhizobium onobrychidis* OM4<sup>T</sup> possessed 136 transposases (and 33 *xerC/xerD* recombinases), which  
491 is extraordinarily high among the representatives of *Phyllobacteriaceae* and *Rhizobiaceae* used in our  
492 analyses (Tab. 1, Fig. 3). A higher rate of transposable elements can be related to sessile endosymbiotic



493 bacteria [68]. However, this pattern was associated with reductive genome evolution of such sessile  
494 strains, which is not given for the strain described here. It has been discussed that the development of  
495 the nitrogen-fixing symbioses in legume nodules required co-evolution of legumes and rhizobia [69]. Zhao  
496 et al. [70] however showed that adaptive evolution of symbiotic compatibility could be achieved by  
497 spontaneous transposition of inserted sequences (ISs). This was demonstrated by the observation that  
498 different *Sinorhizobium* strains do form either nitrogen-fixing nodules or uninfected pseudonodules [70].  
499 Next to ISs, site-specific recombinases *xerC* and *xerD* contribute to genome plasticity and mediate *e.g.*  
500 formation and resolution of plasmid co-integrates [71]. It was shown that *xerC* is crucial for competitive  
501 root colonization [72], [73]. Accordingly, the high number of *xerC* / *xerD* genes in *M. onobrychidis* OM4<sup>T</sup>  
502 suggests its competitive root colonization ability [72, 74].

503 Particular secretion systems are known to be crucial for bacteria/plant interaction (T1SS, T3SS, T4SS) and  
504 competitive plant colonization (T6SS) [75], and plasmid transfer across the rhizobial community (T4SS)  
505 [76]. Type III secretion systems (T3SSs) are well known for effector translocation into eukaryotic host cells  
506 and thus a major mediator for pathogenicity [77, 78]. Such systems are however found to be present in  
507 symbiotic bacteria, where they contribute to a stable host-microbe interaction [79, 80]. *Mesorhizobium*  
508 *onobrychidis* OM4<sup>T</sup> encodes two T3SSs and two T4SSs suggesting an effective interaction with its host.

509 One genomic region of *M. onobrychidis* OM4<sup>T</sup> fulfilled some but not all of the criteria of a symbiosis island  
510 defined by Ling and co-workers [67]. The tool IslandViewer however supported its nature as a genomic  
511 island. The fact of a presence of higher density of PGPTs on this island compared to the density of the  
512 total genome raised the question if the criteria of a symbiosis island have to be extended by the PGPT  
513 density. PGPT annotation is challenging and not standardized. The use of the novel PLaBAse database and  
514 supporting online tools close this gap [57].

515

516

517 Based on our functional analysis, the following functional characteristics for *M. onobrychidis* OM4<sup>T</sup> can be  
518 proposed. It is a rather sessile strain, as it lacks the genes for “chemotaxis” and “flagellar assembly”. The  
519 strain is adapted to the plant metabolism, as it does not harbour an enriched set of carbohydrate, amino  
520 acid and nucleotide metabolic genes compared to other plant-associated bacteria here analysed. It carries  
521 a remarkable set of direct plant-growth promotion traits and might achieve its colonization towards or  
522 inside the plant via biofilms and/or seed transmission [81].

523 The observed growth promotion during the greenhouse experiments suggests the bacterium as an  
524 ‘efficient’ rhizobial species for sainfoin (*O. viciifolia*) under nitrogen-limited plant growth conditions.

525

## 526 **Conclusion**

527 The economic benefit of these newly discovered species still needs to be determined, but their  
528 phylogenetically distant position suggests them as interesting research subjects. *Onobrychidicola*  
529 *muellerharveyae* TH2<sup>T</sup> is the type strain of the monotypic genus *Onobrychidicola*. Since closely related  
530 strains have not been described, a large fraction of its genes is unique due to the overall low homology of  
531 genes. *Onobrychidicola muellerharveyae* TH2<sup>T</sup> carries a high proportion of PGPTs that contributes to  
532 colonisation, stress resistance and competitiveness, rather than to direct plant beneficial effects.  
533 Sufficient PGP potential for commercial application needs to be determined further in *in*  
534 *planta* experiments. Due to its likely potential to antagonize phytopathogens, the strain still could be  
535 considered for biocontrol purposes while developing alternatives to chemical pesticides.

536 A number of recent studies suggested sainfoin to be integrated in modern and sustainable agriculture due  
537 to its beneficial properties on animal nutrition, and animal and soil health [18]. Overall performance of  
538 sainfoin highly depends on an effective symbiosis with rhizobial strains, many of which do not meet the  
539 plants nitrogen-requirements [26]. The study presented here, describes the well-performing novel plant  
540 growth-promoting bacterial species *M. onobrychidis* OM4<sup>T</sup>, which is supported by its PGPTs. our

541 greenhouse experiments showed that this bacterium can be inoculated into a variety of sainfoin cultivars  
542 to improve their biomass production, and might be a promising candidate for application in a sustainable  
543 agricultural system.

544 **Appendix**

545

546 **Formal descriptions of two new *Rhizobiales* species, including new *Rhizobiaceae* genus**

547 The following paragraphs provide formal descriptions (protologues) of the new *Rhizobiaceae* genus and  
548 the two new *Rhizobiales* species (Fig. 5).

549

550 **Description of *Mesorhizobium onobrychidis* sp. nov.**

551 *Mesorhizobium onobrychidis* (o.no.bry'chi.dis. N.L. gen. n. *onobrychidis* of the plant genus *Onobrychis*).

552 Cells are Gram-negative, non-spore-forming and rod-shaped, 1.1 – 2.3  $\mu\text{m}$  ( $1.7 \pm 0.3$  SD) in length, 0.7 –  
553 1.15  $\mu\text{m}$  ( $0.95 \pm 0.1$  SD) wide, (n=15). They are non-motile and non-flagellated. Aerobic, oxidase and  
554 catalase positive. Bacteria grow on YMA, TY and R2A medium. Colonies very slow growing, on YMA  
555 medium appearing within 8-10 days, white, glistening, circular, and convex, 1 mm diameter after 10 days  
556 incubation at 28°C. Growth is observed at temperatures between 10 and 25°C. Nitrate reduction is  
557 negative. Glucose fermentation is negative. Arginine dihydrolase and  $\beta$ -galactosidase tests are negative.  
558 Production of urease is positive. Glucose, L-arabinose, D-mannose, D-mannitol, D-maltose, gluconate and  
559 malate are assimilated. A weak assimilation was observed for caprate. Adipate, citrate and phenylacetate  
560 are not assimilated. The major fatty acids (>5 %) are C<sub>18:1</sub> w7c, C<sub>16:0</sub>, C<sub>19:0</sub> CYCLO w7c, 11-methyl C<sub>18:1</sub> w7c  
561 and C<sub>18:0</sub>. OM4<sup>T</sup> induces effective nodules on its original host plant (cvs. Taja, Perly, ONO 20). Additionally,  
562 genes involved in legume nodulation and nitrogen fixation were identified in the genome of the strain  
563 OM4<sup>T</sup>.

564 The genome size of the type strain (OM4<sup>T</sup>) is 7.55 Mb. The genome is composed of the circular  
565 chromosome (7.32 Mb) and circular plasmid (227 kb). The G+C content of total genomic and/or  
566 chromosomal DNA is 61.9 %.

567 The type strain OM4<sup>T</sup> (=DSM 109849 =NCCB 100791) was isolated from a root nodule of *Onobrychis*  
568 *viciifolia*, Germany, in 2019. The DDBJ/EMBL/GenBank accession numbers for the genome sequence are  
569 CP062229 (chromosome) and CP062230 (plasmid).

570

571 **Description of *Onobrychidicola* gen. nov.**

572 *Onobrychidicola* (O.no.bry.chi.di'co.la. N.L. fem. n. *Onobrychis*, a plant genus; L. suff. –cola [from L. masc.  
573 or fem. n. *incola*], inhabitant, dweller; N.L. masc. n. *Onobrychidicola*, a dweller of *Onobrychis*).

574 Cells are aerobic, Gram-negative, non-spore-forming, rod-shaped, non-motile and non-flagellated.  
575 Oxidase and catalase positive. The major fatty acids (>5 %) are C<sub>18:1</sub> w7c, C<sub>19:0</sub> CYCLO w7c, C<sub>16:0</sub> and C<sub>17:0</sub>  
576 CYCLO w7c. The G + C content of total genomic DNA of the type strain of the type species is 60.4 and 60.6  
577 %, respectively. The genus *Onobrychidicola* has been separated from other *Rhizobiaceae* genera based on  
578 core-genome phylogeny, whole- and core-proteome comparisons (wpAAI and cpAAI, respectively), as well  
579 as pan-genome and functional analyses.

580 The type species is *Onobrychidicola muellerharveyae*.

581

582 **Description of *Onobrychidicola muellerharveyae* sp. nov.**

583 *Onobrychidicola muellerharveyae* (muel.ler.har'vey.ae. N.L. gen. n. muellerharveyae named in honour of  
584 Dr. Irene Mueller-Harvey, for her outstanding work on sainfoin).

585 Cells are aerobic, Gram-negative, non-spore-forming, rod-shaped 1.44–2.63 µm (2.0 ± 0.3) in length, 0.8–  
586 1.4 µm (1.1 ± 0.1) wide (n= 20), non-motile and non-flagellated, oxidase and catalase positive bacteria  
587 that shows relatively good growth on YMA, TY and R2A medium. Colonies slow growing on YMA medium  
588 whitish to pale creamy, variable in size and shape, 1–4 mm diameter after 10 days growth at 28 °C.  
589 Growth was observed at temperature range between 10 and 30 °C. Nitrate reduction and glucose  
590 fermentation are negative. Arginine dihydrolase and gelatin hydrolysis tests are negative. Production of

591 urease and esculin hydrolysis are positive. Production of  $\beta$ -galactosidase is weakly positive. D-mannose  
592 and D-glucose are assimilated. A weak assimilation was observed for L-arabinose, D-mannitol, D-maltose,  
593 gluconate and caprate. Adipate, malate, citrate and phenylacetate are not assimilated. The major fatty  
594 acids (>5 %) are C<sub>18:1</sub> w7c, C<sub>19:0</sub> CYCLO w7c, C<sub>16:0</sub> and C<sub>17:0</sub> CYCLO w7c. The strain TH2<sup>T</sup> could not induce  
595 nodules on its original host plant. Accordingly, genes involved in legume nodulation and nitrogen fixation  
596 were absent in the genome of the strain TH2<sup>T</sup>.

597 The genome size of the type strain (TH2<sup>T</sup>) is 6.44 Mb. The genome is composed of the circular chromosome  
598 (5.88 Mb) and three circular plasmids (98-238 kb). The G+C content of total genomic and chromosomal  
599 DNA is 60.4 and 60.6 %, respectively.

600 The type strain TH2<sup>T</sup> (=DSM 109848<sup>T</sup> =NCCB 100790<sup>T</sup>) was isolated from a root nodule of *Onobrychis*  
601 *viciifolia* in Germany, in 2019. The DDBJ/EMBL/GenBank accession numbers for the genome sequence are  
602 CP062231-CP062234.

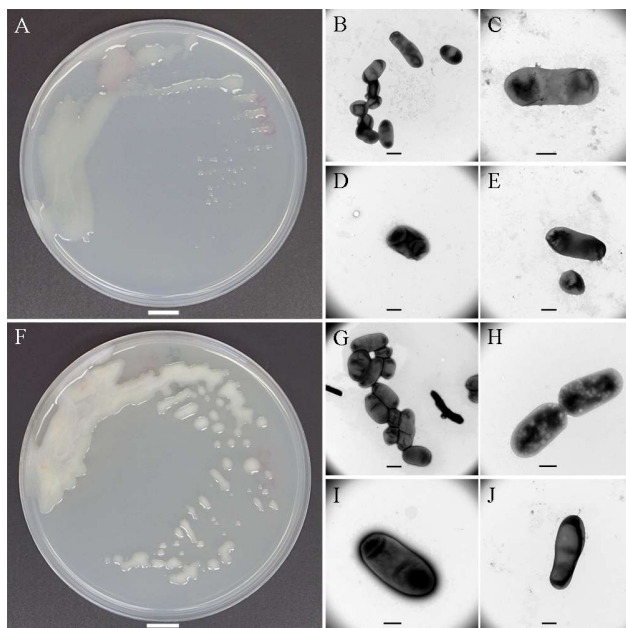

603  
604 **Fig. 5.** Colonies and cells of *Mesorhizobium onobrychidis* strain OM4<sup>T</sup> and *Onobrychidicola muellerharveyae* strain  
605 TH2<sup>T</sup>. A) colonies of OM4<sup>T</sup> on YMA after 10 days incubation at 28 °C, B-E) TEM micrographs of cells of OM4<sup>T</sup> grown

606 in YMA. F) colonies of *O. muellerharveyae* strain TH2<sup>T</sup> on YMA after 10 days incubation G-J) TEM micrographs of  
607 cells of *O. muellerharveyae* strain TH2<sup>T</sup> grown in YMA liquid. Scale: A, F: 100 μm, B, G: 1 μm, C, D, E, H, I 500 nm.

608

## 609 **Acknowledgements**

610 This work was partially funded by the Federal Ministry of Food and Agriculture (BMEL) based on a decision  
611 of the Parliament of the Federal Republic of Germany via the Agency of Renewable Resources (FNR). The  
612 work of NK was funded by the Deutsche Forschungsgemeinschaft (DFG, German Research Foundation) –  
613 Projektnummer 429677233.

614 Special thanks to Dr. Roland Kölliker for providing sainfoin cultivar Taja from the Polish breeder  
615 Malopolska Hodowla Roslin Spolka z.o.o in Krakow. The authors gratefully acknowledge Prof. Aharon Oren  
616 (The Hebrew University of Jerusalem, Jerusalem, Israel), Prof. Bernhard Schink (University of Konstanz,  
617 Konstanz, Germany) and Prof. George M. Garrity (Michigan State University, East Lansing, MI, USA) for  
618 their valuable help on nomenclature aspects. We thank Kristin Müller, Heike Bosse, Gesa Martens for  
619 excellent technical support for molecular studies, culture maintenance, physiological analyses, and plant  
620 maintains. We thank Jessica Ponath for valuable contribution to TEM studies. We thank Simone Severitt  
621 and Nicole Heyer for excellent technical assistance regarding complete genome sequencing. Special thank  
622 goes to Prof. Daniel H. Huson from the University of Tübingen for providing his facilities for batch genome  
623 annotation and comparison. We would like to thank Drs Yvonne Becker and Wolfgang Maier for facilitating  
624 laboratory and greenhouse experiments and Dr. Ahmed Elhady for scientific discussions during the  
625 laboratory works. This research was partially enabled through computational resources provided by  
626 BMBF-funded de.NBI Cloud within the German Network for Bioinformatics Infrastructure (de.NBI)  
627 (031A537B, 031A533A, 031A538A, 031A533B, 031A535A, 031A537C, 031A534A, 031A532B).

628 **Authors contribution**

629 SA and TT conceived and designed the study. SA, UL, ML and TT carried out the plant growth experiments.  
630 SA, NK, AF, SV and MN performed phenotypic and physiological tests. SA, NK, SP, MB and TT performed  
631 the data analysis and figure drawing. BB and CS performed whole genome sequencing. All authors  
632 contributed to drafting and revising the manuscript.

633

634 **Data availability**

635 Genome Sequences are available at NCBI GenBank under the accession numbers CP062229-CP062230  
636 and CP062231-CP062234, respectively. Sequences of single genes are available at NCBI GenBank under  
637 the accession numbers MW915806 - MW915808, and MW917139 - MW917144.

638

639 **Compliance with ethical standards**

640 Not applicable

641

642 **Conflict of Interest**

643 The authors declare no competing interest.

644

645 **References**

- 646 [1] Hellriegel H, Wilfarth H. Untersuchungen über die Stickstoffnahrung der Gramineen und  
647 Leguminosen, von H. Hellriegel und H. Wilfarth unter mitwirkung von H. Roemer, R. Günther, H.  
648 Moeller und G. Wimmer. (Referent: H. Hellriegel.). Berlin: Buchdruckerei der "Post" Kayssler 1888.  
649 [2] Lajudie PM de, Young JPW. International committee on systematics of Prokaryotes subcommittee  
650 for the taxonomy of *Rhizobium* and *Agrobacterium* minutes of the meeting, Budapest, 25 August  
651 2016. Int J Syst Evol Microbiol 2017; 67(7): 2485–94  
652 [<https://doi.org/10.1099/ijsem.0.002144>][PMID: 28771120]  
653 [3] Hirsch AM, Lum MR, Downie JA. What makes the rhizobia-legume symbiosis so special? Plant  
654 Physiol. 2001; 127(4): 1484–92  
655 [<https://doi.org/10.1104/pp.010866>]



- 656 [4] Andrews M, Meyer S de, James EK, *et al.* Horizontal Transfer of Symbiosis Genes within and  
657 Between Rhizobial Genera: Occurrence and Importance. *Genes (Basel)* 2018; 9(7)  
658 [<https://doi.org/10.3390/genes9070321>][PMID: 29954096]
- 659 [5] Remigi P, Zhu J, Young JPW, Masson-Boivin C. Symbiosis within Symbiosis: Evolving Nitrogen-Fixing  
660 Legume Symbionts. *Trends Microbiol* 2016; 24(1): 63–75  
661 [<https://doi.org/10.1016/j.tim.2015.10.007>][PMID: 26612499]
- 662 [6] González V, Bustos P, Ramírez-Romero MA, *et al.* The mosaic structure of the symbiotic plasmid of  
663 *Rhizobium etli* CFN42 and its relation to other symbiotic genome compartments. *Genome Biol* 2003;  
664 4(6): R36  
665 [<https://doi.org/10.1186/gb-2003-4-6-r36>][PMID: 12801410]
- 666 [7] Martínez-Hidalgo P, Hirsch AM. The nodule microbiome: N<sub>2</sub>-fixing rhizobia do not live alone.  
667 *Phytobiomes Journal* 2017; 1(2): 70–82  
668 [<https://doi.org/10.1094/PBIOMES-12-16-0019-RVW>]
- 669 [8] Peix A, Ramírez-Bahena MH, Velázquez E, Bedmar EJ. Bacterial associations with legumes. *Critical*  
670 *Reviews in Plant Sciences* 2015; 34(1-3): 17–42  
671 [<https://doi.org/10.1080/07352689.2014.897899>]
- 672 [9] Tokgöz S, Lakshman DK, Ghozlan MH, Pinar H, Roberts DP, Mitra A. Soybean Nodule-Associated  
673 Non-Rhizobial Bacteria Inhibit Plant Pathogens and Induce Growth Promotion in Tomato. *Plants*  
674 (Basel) 2020; 9(11): 1494  
675 [<https://doi.org/10.3390/plants9111494>][PMID: 33167465]
- 676 [10] Yao LJ, Shen YY, Zhan JP, Xu W, Cui GL, Wei GH. *Rhizobium taibaishanense* sp. nov., isolated from a  
677 root nodule of *Kummerowia striata*. *Int J Syst Evol Microbiol* 2012; 62(Pt 2): 335–41  
678 [<https://doi.org/10.1099/ijs.0.029108-0>][PMID: 21421926]
- 679 [11] Yan J, Li Y, Han XZ, *et al.* *Agrobacterium deltaense* sp. nov., an endophytic bacteria isolated from  
680 nodule of *Sesbania cannabina*. *Arch Microbiol* 2017; 199(7): 1003–9  
681 [<https://doi.org/10.1007/s00203-017-1367-0>][PMID: 28386665]
- 682 [12] Delamuta JRM, Scherer AJ, Ribeiro RA, Hungria M. Genetic diversity of *Agrobacterium* species  
683 isolated from nodules of common bean and soybean in Brazil, Mexico, Ecuador and Mozambique,  
684 and description of the new species *Agrobacterium fabacearum* sp. nov. *Int J Syst Evol Microbiol*  
685 2020; 70(7): 4233–44  
686 [<https://doi.org/10.1099/ijsem.0.004278>][PMID: 32568030]
- 687 [13] Wang ET, Tan ZY, Willems A, Fernández-López M, Reinhold-Hurek B, Martínez-Romero E.  
688 *Sinorhizobium morelense* sp. nov., a *Leucaena leucocephala*-associated bacterium that is highly  
689 resistant to multiple antibiotics. *Int J Syst Evol Microbiol* 2002; 52(Pt 5): 1687–93  
690 [<https://doi.org/10.1099/00207713-52-5-1687>][PMID: 12361275]
- 691 [14] Jordan DC. NOTES: Transfer of *Rhizobium japonicum* Buchanan 1980 to *Bradyrhizobium* gen. nov., a  
692 genus of slow-growing, root nodule bacteria from leguminous plants. *International Journal of*  
693 *Systematic Bacteriology* 1982; 32(1): 136–9  
694 [<https://doi.org/10.1099/00207713-32-1-136>]
- 695 [15] Jarvis BDW, van Berkum P, Chen WX, *et al.* Transfer of *Rhizobium loti*, *Rhizobium huakuii*, *Rhizobium*  
696 *ciceri*, *Rhizobium mediterraneum*, and *Rhizobium tianshanense* to *Mesorhizobium* gen. nov. *Int J*

- 697 Syst Evol Microbiol 1997; 47(3): 895–8  
698 [<https://doi.org/10.1099/00207713-47-3-895>]
- 699 [16] Garrity GM, Bell JA, and Lilburn T. Family VII. Bradyrhizobiaceae fam. nov. In: Brenner DJ, Krieg NR,  
700 Staley JT, Garrity GM, editors. Bergey's Manual® of systematic bacteriology: Volume Two The  
701 Proteobacteria Part C The Alpha-, Beta-, Delta-, and Epsilonproteobacteria. 2nd ed. 2005. New York,  
702 NY: Springer US 2005; 438.
- 703 [17] Mergaert J, Swings J. Family IV. Phyllobacteriaceae fam. nov. In: Brenner DJ, Krieg NR, Staley JT,  
704 Garrity GM, editors. Bergey's Manual® of systematic bacteriology: Volume Two The Proteobacteria  
705 Part C The Alpha-, Beta-, Delta-, and Epsilonproteobacteria. 2nd ed. 2005. New York, NY: Springer  
706 US 2005; 393.
- 707 [18] Mora-Ortiz M, Smith LMJ. *Onobrychis viciifolia* ; a comprehensive literature review of its history,  
708 etymology, taxonomy, genetics, agronomy and botany. Plant Genet. Resour. 2018; 16(5): 403–18  
709 [<https://doi.org/10.1017/S1479262118000230>]
- 710 [19] Hayot Carbonero C, Mueller-Harvey I, Brown TA, Smith L. Sainfoin (*Onobrychis viciifolia*): a  
711 beneficial forage legume. Plant Genet. Resour. 2011; 9(01): 70–85  
712 [<https://doi.org/10.1017/S1479262110000328>]
- 713 [20] McMahon LR, McAllister TA, Berg BP, *et al.* A review of the effects of forage condensed tannins on  
714 ruminal fermentation and bloat in grazing cattle. Can. J. Plant Sci. 2000; 80(3): 469–85  
715 [<https://doi.org/10.4141/P99-050>]
- 716 [21] Sheppard SC, Cattani DJ, Ominski KH, Biligetü B, Bittman S, McGeough EJ. Sainfoin production in  
717 western Canada: A review of agronomic potential and environmental benefits. Grass Forage Sci  
718 2019; 74(1): 6–18  
719 [<https://doi.org/10.1111/gfs.12403>]
- 720 [22] Burton JC, Curley RL. Nodulation and nitrogen fixation in sainfoin (*Onobrychis sativa*, Lam.) as  
721 influenced by strains of rhizobia. Bull. Mont. agric. Exp. Stn. 1970; 627: 3–5.
- 722 [23] Sims JR, Muir MK, Carleton AE. Evidence of ineffective rhizobia and its relation to the nitrogen  
723 nutrition of sainfoin. Bull. Montana. Agricultural Experimental Station 1970; 627: 8–12.
- 724 [24] Sheehy JE, Popple SC. Photosynthesis, water relations, temperature and canopy structure as factors  
725 influencing the growth of sainfoin (*Onobrychis viciifolia* Scop.) and Lucerne (*Medicago sativa* L.).  
726 Annals of Botany 1981; 48(2): 113–28.
- 727 [25] Provorov NA, Tikhonovich IA. Genetic resources for improving nitrogen fixation in legume-rhizobia  
728 symbiosis. Genetic Resources and Crop Evolution 2003; 50(1): 89–99  
729 [<https://doi.org/10.1023/A:1022957429160>]
- 730 [26] Prévost D, Bordeleau LM, Antoun H. Symbiotic effectiveness of indigenous arctic rhizobia on a  
731 temperate forage legume: Sainfoin (*Onobrychis viciifolia*). Plant Soil 1987; 104(1): 63–9  
732 [<https://doi.org/10.1007/BF02370626>]
- 733 [27] Prévost D, Bordeleau LM, Caudry-Reznick S, Schulman HM, Antoun H. Characteristics of rhizobia  
734 isolated from three legumes indigenous to the Canadian high arctic: *Astragalus alpinus*, *Oxytropis*  
735 *maydelliana*, and *Oxytropis arctobia*. Plant Soil 1987; 98(3): 313–24  
736 [<https://doi.org/10.1007/BF02378352>]
- 737 [28] Laguerre G, van Berkum P, Amarger N, Prévost D. Genetic diversity of rhizobial symbionts isolated  
738 from legume species within the genera *Astragalus*, *Oxytropis*, and *Onobrychis*. Appl Environ

- 739 Microbiol 1997; 63(12): 4748–58  
740 [<https://doi.org/10.1128/AEM.63.12.4748-4758.1997>][PMID: 9406393]
- 741 [29] Andrews M, Andrews ME. Specificity in legume-rhizobia symbioses. *Int J Mol Sci* 2017; 18(4)  
742 [<https://doi.org/10.3390/ijms18040705>][PMID: 28346361]
- 743 [30] Sengupta M, Austin S. Prevalence and significance of plasmid maintenance functions in the  
744 virulence plasmids of pathogenic bacteria. *Infect. Immun.* 2011; 79(7): 2502–9  
745 [<https://doi.org/10.1128/IAI.00127-11>][PMID: 21555398]
- 746 [31] Juhas M, van der Meer JR, Gaillard M, Harding RM, Hood DW, Crook DW. Genomic islands: tools of  
747 bacterial horizontal gene transfer and evolution. *FEMS Microbiol Rev* 2009; 33(2): 376–93  
748 [<https://doi.org/10.1111/j.1574-6976.2008.00136.x>][PMID: 19178566]
- 749 [32] Bañuelos-Vazquez LA, Torres Tejerizo G, Brom S. Regulation of conjugative transfer of plasmids and  
750 integrative conjugative elements. *Plasmid* 2017; 91: 82–9  
751 [<https://doi.org/10.1016/j.plasmid.2017.04.002>][PMID: 28438469]
- 752 [33] Sullivan JT, Ronson CW. Evolution of rhizobia by acquisition of a 500-kb symbiosis island that  
753 integrates into a phe-tRNA gene. *Proceedings of the National Academy of Sciences* 1998; 95(9):  
754 5145–9  
755 [<https://doi.org/10.1073/pnas.95.9.5145>][PMID: 9560243]
- 756 [34] Sullivan JT, Patrick HN, Lowther WL, Scott DB, Ronson CW. Nodulating strains of *Rhizobium loti* arise  
757 through chromosomal symbiotic gene transfer in the environment. *Proceedings of the National*  
758 *Academy of Sciences* 1995; 92(19): 8985–9  
759 [<https://doi.org/10.1073/pnas.92.19.8985>][PMID: 7568057]
- 760 [35] Schieblich J. Beitrag zur Züchtung von *Espartette* (*Onobrychis viciaefolia* Scop.). *Der Züchter* 1951;  
761 21: 132–6.
- 762 [36] Elhady A, Heuer H, Hallmann J. Plant parasitic nematodes on soybean in expanding production areas  
763 of temperate regions. *J Plant Dis Prot* 2018; 125(6): 567–76  
764 [<https://doi.org/10.1007/s41348-018-0188-y>]
- 765 [37] Goris J, Konstantinidis KT, Klappenbach JA, Coenye T, Vandamme P, Tiedje JM. DNA-DNA  
766 hybridization values and their relationship to whole-genome sequence similarities. *Int J Syst Evol*  
767 *Microbiol* 2007; 57(Pt 1): 81–91  
768 [<https://doi.org/10.1099/ijs.0.64483-0>][PMID: 17220447]
- 769 [38] Konstantinidis KT, Tiedje JM. Towards a genome-based taxonomy for prokaryotes. *J Bacteriol* 2005;  
770 187(18): 6258–64  
771 [<https://doi.org/10.1128/JB.187.18.6258-6264.2005>][PMID: 16159757]
- 772 [39] Konstantinidis KT, Rosselló-Móra R, Amann R. Uncultivated microbes in need of their own  
773 taxonomy. *ISME J* 2017; 11(11): 2399–406  
774 [<https://doi.org/10.1038/ismej.2017.113>][PMID: 28731467]
- 775 [40] Richter M, Rosselló-Móra R. Shifting the genomic gold standard for the prokaryotic species  
776 definition. *Proc Natl Acad Sci U S A* 2009; 106(45): 19126–31  
777 [<https://doi.org/10.1073/pnas.0906412106>][PMID: 19855009]
- 778 [41] Meier-Kolthoff JP, Auch AF, Klenk H-P, Göker M. Genome sequence-based species delimitation with  
779 confidence intervals and improved distance functions. *BMC Bioinformatics* 2013; 14: 60  
780 [<https://doi.org/10.1186/1471-2105-14-60>][PMID: 23432962]

- 781 [42] Meier-Kolthoff JP, Göker M. TYGS is an automated high-throughput platform for state-of-the-art  
782 genome-based taxonomy. *Nat Commun* 2019; 10(1): 2182  
783 [<https://doi.org/10.1038/s41467-019-10210-3>][PMID: 31097708]
- 784 [43] Ondov BD, Treangen TJ, Melsted P, *et al.* Mash: fast genome and metagenome distance estimation  
785 using MinHash. *Genome Biol* 2016; 17(1): 132  
786 [<https://doi.org/10.1186/s13059-016-0997-x>][PMID: 27323842]
- 787 [44] Galata V, Fehlmann T, Backes C, Keller A. PLSDB: a resource of complete bacterial plasmids. *Nucleic  
788 Acids Res* 2019; 47(D1): D195-D202  
789 [<https://doi.org/10.1093/nar/gky1050>][PMID: 30380090]
- 790 [45] Huson DH, Bryant D. Application of phylogenetic networks in evolutionary studies. *Mol Biol Evol*  
791 2006; 23(2): 254–67  
792 [<https://doi.org/10.1093/molbev/msj030>][PMID: 16221896]
- 793 [46] Bagci C, Bryant D, Cetinkaya B, Huson DH. Microbial Phylogenetic Context Using Phylogenetic  
794 Outlines. *Genome Biol Evol* 2021; 13(9)  
795 [<https://doi.org/10.1093/gbe/evab213>][PMID: 34519776]
- 796 [47] Seemann T. Prokka: rapid prokaryotic genome annotation. *Bioinformatics* 2014; 30(14): 2068–9  
797 [<https://doi.org/10.1093/bioinformatics/btu153>][PMID: 24642063]
- 798 [48] Page AJ, Cummins CA, Hunt M, *et al.* Roary: rapid large-scale prokaryote pan genome analysis.  
799 *Bioinformatics* 2015; 31(22): 3691–3  
800 [<https://doi.org/10.1093/bioinformatics/btv421>][PMID: 26198102]
- 801 [49] Price MN, Dehal PS, Arkin AP. FastTree 2--approximately maximum-likelihood trees for large  
802 alignments. *PLoS One* 2010; 5(3): e9490  
803 [<https://doi.org/10.1371/journal.pone.0009490>][PMID: 20224823]
- 804 [50] Darling ACE, Mau B, Blattner FR, Perna NT. Mauve: multiple alignment of conserved genomic  
805 sequence with rearrangements. *Genome Res* 2004; 14(7): 1394–403  
806 [<https://doi.org/10.1101/gr.2289704>][PMID: 15231754]
- 807 [51] Huson DH, Auch AF, Qi J, Schuster SC. MEGAN analysis of metagenomic data. *Genome Res* 2007;  
808 17(3): 377–86  
809 [<https://doi.org/10.1101/gr.5969107>][PMID: 17255551]
- 810 [52] Bertelli C, Laird MR, Williams KP, *et al.* IslandViewer 4: expanded prediction of genomic islands for  
811 larger-scale datasets. *Nucleic Acids Res* 2017; 45(W1): W30-W35  
812 [<https://doi.org/10.1093/nar/gkx343>]
- 813 [53] Arndt D, Grant JR, Marcu A, *et al.* PHASTER: a better, faster version of the PHAST phage search tool.  
814 *Nucleic Acids Res* 2016; 44(W1): W16-21  
815 [<https://doi.org/10.1093/nar/gkw387>][PMID: 27141966]
- 816 [54] Zhou Y, Liang Y, Lynch KH, Dennis JJ, Wishart DS. PHAST: a fast phage search tool. *Nucleic Acids Res*  
817 2011; 39(Web Server issue): W347-52  
818 [<https://doi.org/10.1093/nar/gkr485>][PMID: 21672955]
- 819 [55] Blin K, Shaw S, Kloosterman AM, *et al.* antiSMASH 6.0: improving cluster detection and comparison  
820 capabilities. *Nucleic Acids Res* 2021; 49(W1): W29-W35  
821 [<https://doi.org/10.1093/nar/gkab335>][PMID: 33978755]

- 822 [56] Alikhan N-F, Petty NK, Ben Zakour NL, Beatson SA. BLAST Ring Image Generator (BRIG): simple  
823 prokaryote genome comparisons. *BMC Genomics* 2011; 12(1): 402  
824 [<https://doi.org/10.1186/1471-2164-12-402>][PMID: 21824423]
- 825 [57] Patz S, Gautam A, Becker M, Ruppel S, Rodríguez-Palenzuela P, Huson D. PLABase: A comprehensive  
826 web resource for analyzing the plant growth-promoting potential of plant-associated bacteria 2021.
- 827 [58] Letunic I, Bork P. Interactive Tree Of Life (iTOL) v5: an online tool for phylogenetic tree display and  
828 annotation. *Nucleic Acids Res* 2021; 49(W1): W293-W296  
829 [<https://doi.org/10.1093/nar/gkab301>][PMID: 33885785]
- 830 [59] Chun J, Oren A, Ventosa A, *et al.* Proposed minimal standards for the use of genome data for the  
831 taxonomy of prokaryotes. *Int J Syst Evol Microbiol* 2018; 68(1): 461–6  
832 [<https://doi.org/10.1099/ijsem.0.002516>][PMID: 29292687]
- 833 [60] Kuzmanović N, Fagorzi C, Mengoni A, Lassalle F, diCenzo GC. Taxonomy of Rhizobiaceae revisited:  
834 proposal of a new framework for genus delimitation 2021.
- 835 [61] Nguyen TM, van Pham HT, Kim J. *Mesorhizobium soli* sp. nov., a novel species isolated from the  
836 rhizosphere of *Robinia pseudoacacia* L. in South Korea by using a modified culture method. *Antonie*  
837 *Van Leeuwenhoek* 2015; 108(2): 301–10  
838 [<https://doi.org/10.1007/s10482-015-0481-8>][PMID: 25980835]
- 839 [62] Clarke CR, Chinchilla D, Hind SR, *et al.* Allelic variation in two distinct *Pseudomonas syringae* flagellin  
840 epitopes modulates the strength of plant immune responses but not bacterial motility. *New Phytol*  
841 2013; 200(3): 847–60  
842 [<https://doi.org/10.1111/nph.12408>][PMID: 23865782]
- 843 [63] Bender CL, Alarcón-Chaidez F, Gross DC. *Pseudomonas syringae* phytotoxins: mode of action,  
844 regulation, and biosynthesis by peptide and polyketide synthetases. *Microbiol Mol Biol Rev* 1999;  
845 63(2): 266–92  
846 [<https://doi.org/10.1128/MMBR.63.2.266-292.1999>][PMID: 10357851]
- 847 [64] Wencewicz TA, Walsh CT. *Pseudomonas syringae* self-protection from tabtoxinine- $\beta$ -lactam by  
848 ligase TblF and acetylase Ttr. *Biochemistry* 2012; 51(39): 7712–25  
849 [<https://doi.org/10.1021/bi3011384>][PMID: 22994681]
- 850 [65] Merfa MV, Niza B, Takita MA, Souza AA de. The MqsRA Toxin-Antitoxin System from *Xylella*  
851 *fastidiosa* Plays a Key Role in Bacterial Fitness, Pathogenicity, and Persister Cell Formation. *Front*  
852 *Microbiol* 2016; 7: 904  
853 [<https://doi.org/10.3389/fmicb.2016.00904>][PMID: 27375608]
- 854 [66] Rosendahl S, Tamman H, Brauer A, Remm M, Hůrak R. Chromosomal toxin-antitoxin systems in  
855 *Pseudomonas putida* are rather selfish than beneficial. *Sci Rep* 2020; 10(1): 9230  
856 [<https://doi.org/10.1038/s41598-020-65504-0>][PMID: 32513960]
- 857 [67] Ling J, Wang H, Wu P, *et al.* Plant nodulation inducers enhance horizontal gene transfer of  
858 *Azorhizobium caulinodans* symbiosis island. *Proc Natl Acad Sci U S A* 2016; 113(48): 13875–80  
859 [<https://doi.org/10.1073/pnas.1615121113>][PMID: 27849579]
- 860 [68] Ran L, Larsson J, Vigil-Stenman T, *et al.* Correction: Genome Erosion in a Nitrogen-Fixing Vertically  
861 Transmitted Endosymbiotic Multicellular Cyanobacterium. *PLoS One* 2010; 5(9)  
862 [<https://doi.org/10.1371/annotation/835c5766-5128-41c4-b636-adfe0c503103>]

- 863 [69] La Coba de Peña T, Fedorova E, Pueyo JJ, Lucas MM. The Symbiosome: Legume and Rhizobia Co-  
864 evolution toward a Nitrogen-Fixing Organelle? *Front Plant Sci* 2017; 8: 2229  
865 [<https://doi.org/10.3389/fpls.2017.02229>][PMID: 29403508]
- 866 [70] Zhao R, Liu LX, Zhang YZ, *et al.* Adaptive evolution of rhizobial symbiotic compatibility mediated by  
867 co-evolved insertion sequences. *ISME J* 2018; 12(1): 101–11  
868 [<https://doi.org/10.1038/ismej.2017.136>][PMID: 28800133]
- 869 [71] Cameranesi MM, Morán-Barrio J, Limansky AS, Repizo GD, Viale AM. Site-Specific Recombination at  
870 XerC/D Sites Mediates the Formation and Resolution of Plasmid Co-integrates Carrying a blaOXA-  
871 58- and TnaphA6-Resistance Module in *Acinetobacter baumannii*. *Front Microbiol* 2018; 9: 66  
872 [<https://doi.org/10.3389/fmicb.2018.00066>][PMID: 29434581]
- 873 [72] Dekkers LC, Phoelich CC, van der Fits L, Lugtenberg BJ. A site-specific recombinase is required for  
874 competitive root colonization by *Pseudomonas fluorescens* WCS365. *Proceedings of the National*  
875 *Academy of Sciences* 1998; 95(12): 7051–6  
876 [<https://doi.org/10.1073/pnas.95.12.7051>][PMID: 9618537]
- 877 [73] Dekkers LC, Mulders IH, Phoelich CC, Chin-A-Woeng TF, Wijfjes AH, Lugtenberg BJ. The *sss*  
878 colonization gene of the tomato-*Fusarium oxysporum* f. sp. *radicis-lycopersici* biocontrol strain  
879 *Pseudomonas fluorescens* WCS365 can improve root colonization of other wild-type *pseudomonas*  
880 spp.bacteria. *Molecular Plant-Microbe Interactions* 2000; 13(11): 1177–83  
881 [<https://doi.org/10.1094/MPMI.2000.13.11.1177>][PMID: 11059484]
- 882 [74] Cornet F, Hallet B, Sherratt DJ. Xer recombination in *Escherichia coli*. Site-specific DNA  
883 topoisomerase activity of the XerC and XerD recombinases. *Journal of Biological Chemistry* 1997;  
884 272(35): 21927–31  
885 [<https://doi.org/10.1074/jbc.272.35.21927>][PMID: 9268326]
- 886 [75] Lucke M, Correa MG, Levy A. The Role of Secretion Systems, Effectors, and Secondary Metabolites  
887 of Beneficial Rhizobacteria in Interactions With Plants and Microbes. *Front Plant Sci* 2020; 11:  
888 589416  
889 [<https://doi.org/10.3389/fpls.2020.589416>][PMID: 33240304]
- 890 [76] Trokter M, Waksman G. Translocation through the Conjugative Type IV Secretion System Requires  
891 Unfolding of Its Protein Substrate. *J Bacteriol* 2018; 200(6)  
892 [<https://doi.org/10.1128/JB.00615-17>][PMID: 29311273]
- 893 [77] Coburn B, Sekirov I, Finlay BB. Type III secretion systems and disease. *Clin Microbiol Rev* 2007; 20(4):  
894 535–49  
895 [<https://doi.org/10.1128/CMR.00013-07>][PMID: 17934073]
- 896 [78] Tang X, Xiao Y, Zhou J-M. Regulation of the type III secretion system in phytopathogenic bacteria.  
897 *Molecular Plant-Microbe Interactions* 2006; 19(11): 1159–66  
898 [<https://doi.org/10.1094/MPMI-19-1159>][PMID: 17073299]
- 899 [79] Dale C, Plague GR, Wang B, Ochman H, Moran NA. Type III secretion systems and the evolution of  
900 mutualistic endosymbiosis. *Proceedings of the National Academy of Sciences* 2002; 99(19): 12397–  
901 402  
902 [<https://doi.org/10.1073/pnas.182213299>][PMID: 12213957]
- 903 [80] Songwattana P, Noisangiam R, Teamtisong K, *et al.* Type 3 Secretion System (T3SS) of  
904 *Bradyrhizobium* sp. DOA9 and Its Roles in Legume Symbiosis and Rice Endophytic Association. *Front*

905           Microbiol 2017; 8: 1810  
906           [<https://doi.org/10.3389/fmicb.2017.01810>][PMID: 28979252]  
907 [81] Mora Y, Díaz R, Vargas-Lagunas C, *et al.* Nitrogen-fixing rhizobial strains isolated from common bean  
908 seeds: phylogeny, physiology, and genome analysis. *Appl Environ Microbiol* 2014; 80(18): 5644–54  
909           [<https://doi.org/10.1128/AEM.01491-14>][PMID: 25002426]  
910
